# Supplementary material
Source: PubMed Central journal article supplement (PMC2783389)
Supplement: NIHMS151677-supplement-3_si_003.pdf [file NIHMS151677-supplement-3_si_003.pdf]

# Evidence for a Boroxinate Based Brønsted Acid Derivative of VAPOL as the Active Catalyst in the Catalytic Asymmetric Aziridination Reaction.

Gang Hu, Li Huang, Rui Huang and William. D. Wulff\*

*Contribution from the Department of Chemistry, Michigan State University,*

*East Lansing, MI, 48824*

Supporting information

## Table of Contents:

|    |                                                                                                           |     |
|----|-----------------------------------------------------------------------------------------------------------|-----|
| 1. | General Information                                                                                       | S2  |
| 2. | Preparation of Pyroborate <b>6</b> Borane•Dimethyl Sulfide Complex and Phenol                             | S3  |
| 3. | Preparation of Tetramethylammonium VAPOL Boroxinate Complex <b>7</b> .                                    | S4  |
| 4. | X-Ray Structure of Tetramethylammonium VAPOLBoroxinate Complex <b>7</b> .                                 | S7  |
| 5. | Preparation of Dimethylaminopyridinium VAPOL Boroxinate Complex <b>8</b> .                                | S25 |
| 6. | X-Ray Structure of Dimethylaminopyridinium VAPOL Boroxinate Complex <b>8</b> .                            | S30 |
| 7. | Preparation of the VAPOL Boroxinate Imine Complex <b>10</b> and its Reaction with Ethyl Diazoacetate.     | S47 |
| 8. | Preparation of the VAPOL Boroxinate Imine Complex <b>10</b> and its use as a Catalyst in the AZ Reaction. | S53 |
| 9. | References                                                                                                | S69 |

## 1. General information.

(*S*)-VAPOL (>99% ee) was prepared by our previously described procedure<sup>1</sup> and was dried over P<sub>2</sub>O<sub>5</sub> overnight under reduced pressure (0.1 mm Hg) with refluxing hexane in a Abderhalden drying apparatus. B(OPh)<sub>3</sub> was used as purchased from Aldrich and was stored in a desiccator. Phenol was purified by distillation and stored in a desiccator. Tetramethyl ammonium acetate, borane dimethylsulfide and 4-dimethylaminopyridine (DMAP) were purchased from Aldrich and used without purification. The tetramethylammonium acetate is highly hygroscopic and was opened in a dry box. Toluene and THF were dried over sodium and freshly distilled prior to use. Deuterium solvents as well as dichloromethane and pentane were dried over 3 Å molecular sieves and then distilled under argon and stored in a dry box. Melting points were determined on a Thomas Hoover capillary melting point apparatus. <sup>1</sup>H and <sup>13</sup>C NMR spectra were recorded on a Varian 300 MHz or VXR-500 MHz instrument in CDCl<sub>3</sub> unless otherwise noted. The residual peak of CDCl<sub>3</sub> was used as the internal standard for both <sup>1</sup>H NMR (δ = 7.24 ppm) and <sup>13</sup>C NMR (δ = 77.0 ppm). <sup>11</sup>B NMR spectra were recorded on a Varian 500 MHz instrument in CDCl<sub>3</sub> unless otherwise noted. Pure BF<sub>3</sub>•OEt<sub>2</sub> (δ = 0 ppm) was used as the external standard for <sup>11</sup>B NMR spectra. Both low-resolution and high-resolution mass spectra (MALDI) were performed in the Michigan State University Mass Spectroscopy Facility. Analytical thin-layer chromatography (TLC) was performed on Silicycle silica gel plates with F-254 indicator. Visualization was by short wave (254 nm) and long wave (365nm) ultraviolet light, or by staining with phosphomolybdic acid in ethanol or with potassium permanganate. Flash column chromatography was performed with silica gel 60 (230 – 450 mesh).

## 2. Preparation of Pyroborate 6 from Borane•Dimethyl Sulfide Complex and Phenol.

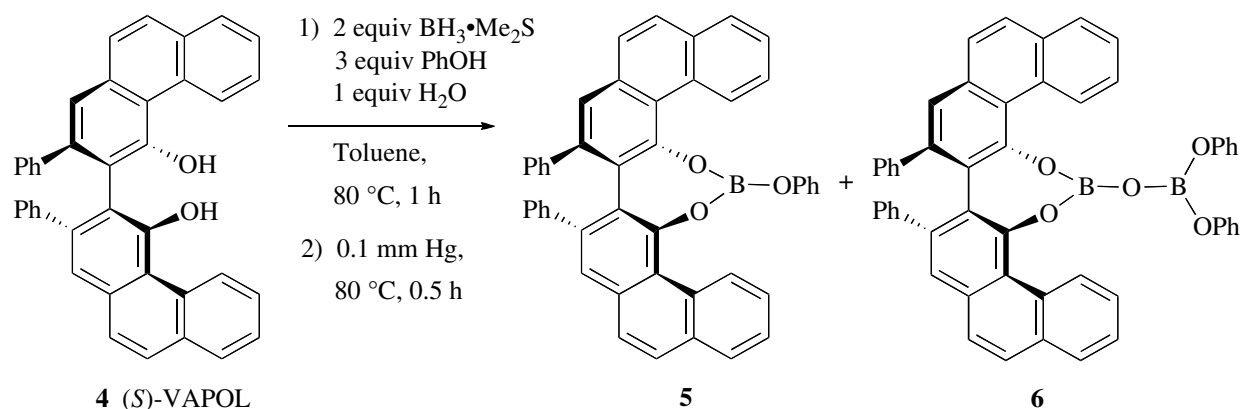

A 25 mL pear-shaped flask that had its 14/20 joint replaced by a high vacuum threaded T-shaped Teflon valve and which was flame dried and cooled under argon to room temperature was equipped with a stir bar and charged (S)-VAPOL (54 mg, 0.1 mmol), phenol (28 mg, 0.3 mmol), 2 mL toluene and 100  $\mu\text{L}$   $\text{BH}_3\text{Me}_2\text{S}$  (2.0 M in toluene, 0.2 mmol). To this solution was added 1.8  $\mu\text{L}$   $\text{H}_2\text{O}$  (0.1 mmol). The Teflon valve was closed to seal the flask and the mixture was then heated to 80 °C for 1 h. The volatiles were removed by carefully opening the Teflon valve and applying high vacuum. When dry, the flask was heated at 80 °C for 0.5 h under high vacuum (0.1 mm Hg). After cooling, the flask with the catalyst was moved into a glove box and the catalyst was dissolved into approximately 0.75 mL  $\text{CDCl}_3$  and analyzed by NMR. The catalyst prepared by this method typically gave a ratio of VAPOL:B1:B2 = 0.1:1.0:8.2 as determined by  $^1\text{H}$  NMR.<sup>2</sup> These ratio are taken from the integration of the bay protons for each species which are: VAPOL **4**  $\delta = 9.77$  ppm in  $\text{CDCl}_3$  (9.88 in toluene d8), mesoborate **5**  $\delta = 9.51$  ppm in  $\text{CDCl}_3$  (9.74 in toluene d8), pyroborate **6**  $\delta = 9.22$  ppm in  $\text{CDCl}_3$  (9.53 in toluene d8). The spectrum shown in Figure 3 in the text contains a small amount of VAPOL. The  $^{11}\text{B}$  NMR spectrum was taken in  $\text{CDCl}_3$  in a quartz NMR tube and, as indicated in Figure 3 in the text, shows two broad peaks at 18.25 ppm and 16.20 ppm (baseline separation not achieved) relative to  $\text{BF}_3 \cdot \text{Et}_2\text{O}$ .

### 3. Preparation of Tetramethylammonium VAPOL Boroxinate Complex 7.

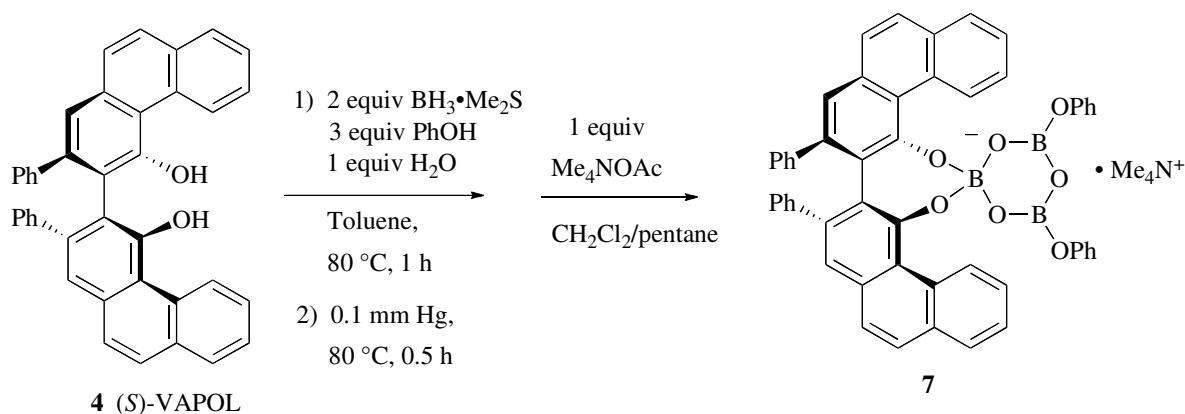

A flame dried 25 mL pear-shaped flask that had its 14/20 joint replaced by a high vacuum threaded T-shaped Teflon valve and which contained a stir bar was cooled under argon to room temperature and charged with (S)-VAPOL (108 mg, 0.2 mmol), PhOH (56.4 mg, 0.6 mol),  $\text{BH}_3\text{Me}_2\text{S}$  (200  $\mu\text{L}$ , 0.4 mmol) and 4 mL toluene, consecutively. To the solution was added deionized water (3.6  $\mu\text{L}$ , 0.2 mmol). The flask was sealed and heated to 80 °C for 1 h. The volatile materials were removed via high vacuum at 80 °C for 0.5 h yielding a mixture of mesoborate **5** and pyroborate **6** as described above. After cooling, the flask containing **5** and **6** was transferred into a glove box. To this mixture was added tetramethylammonium acetate (TMAA) (26.6 mg, 0.2 mmol) and 6 mL  $\text{CH}_2\text{Cl}_2$ . The solution was allowed to stir at room temperature for 24 h followed by addition of pentane until a permanent precipitate appeared. A small amount of  $\text{CH}_2\text{Cl}_2$  was added to the mixture until a clear solution was obtained. The solution was then filtered through a plug of glass wool in a pipette. The colorless solution was collected in a 20 mL vial and capped. The vial was allowed to stand in the glove box overnight. Colorless crystals appeared inside the vial. These crystals were of X-ray quality and could be subjected to crystallographic study directly and the quality of the crystals quickly deteriorated in the absence of solvent. Decanting the mother liquor followed by two washes with a 1:1 mixture

of CH<sub>2</sub>Cl<sub>2</sub>/pentane afforded complex **7** (39 mg, 22% yield) as colorless crystals. The mass spectrum of complex **7** was taken by negative ion MALDI and the parent peak was the boroxinate anion: mass spectrum (MALDI, negative), *m/z* (% rel intensity) 803 M<sup>+</sup> – Me<sub>4</sub>N (100), 727 (14), 407 (8); HRMS *m/z* calcd for C<sub>52</sub>H<sub>34</sub>B<sub>3</sub>O<sub>7</sub> 803.2584, found 803.2588. The <sup>1</sup>H NMR spectrum of complex **11** is shown below and is labeled VAPOL\_B3\_TMA. The symmetry of this molecule is broken as indicated by the observation of two equal sized doublets for the bay region protons at 10.91 and 11.35 ppm. This is interpreted to mean that the migration of the tetramethyl ammonium cation from one face of the boroxinate core to the other face is slow on the NMR time scale. The x-ray structure of complex **7** was also determined and the results from this study are given below. The crystal structures presented in the text of this paper were visualized using the Mercury Program.

VAPOL\_B3\_TMA  
<sup>1</sup>H NMR

11.36  
11.34

10.92  
10.90

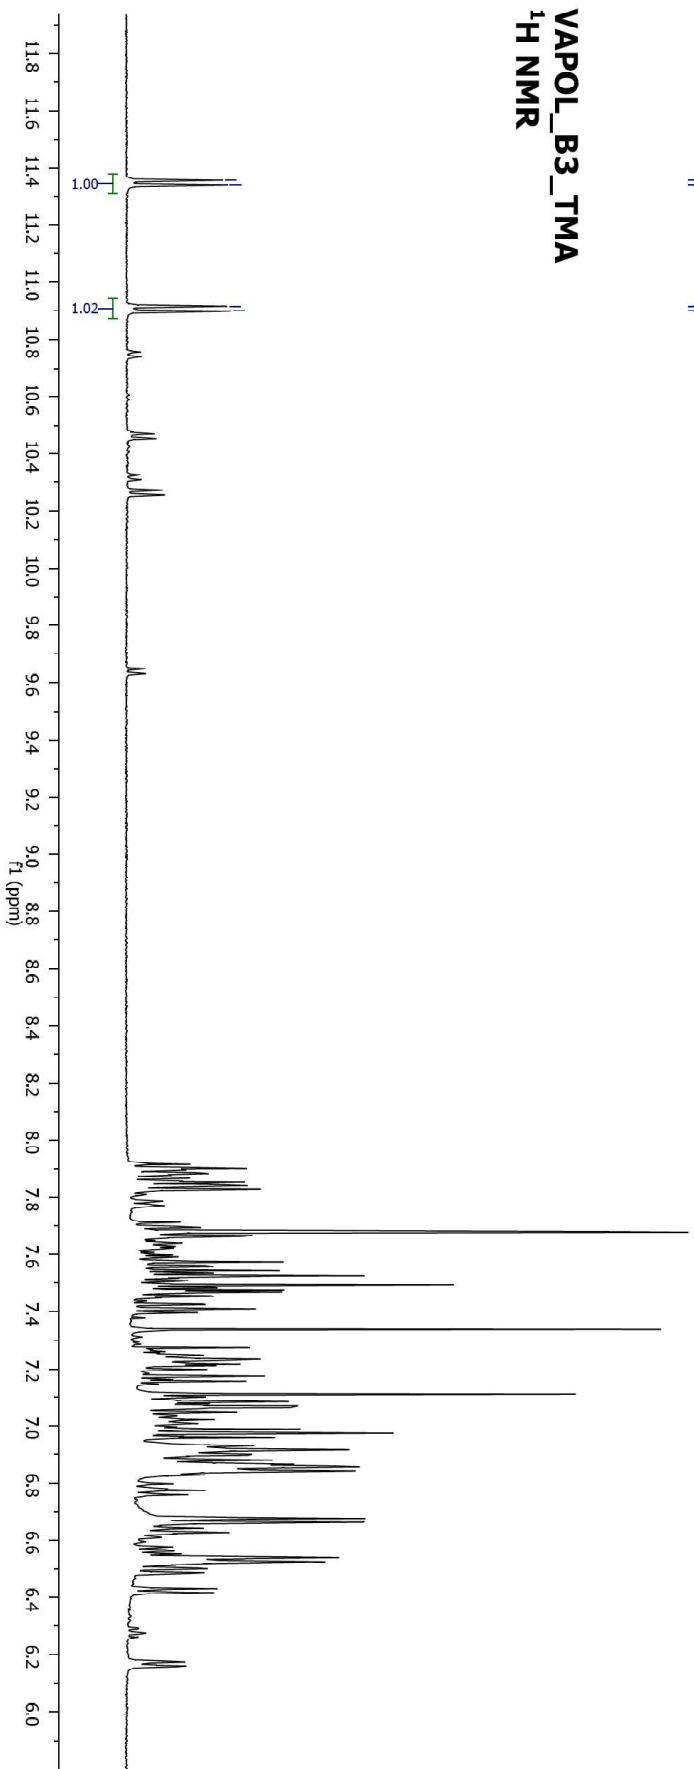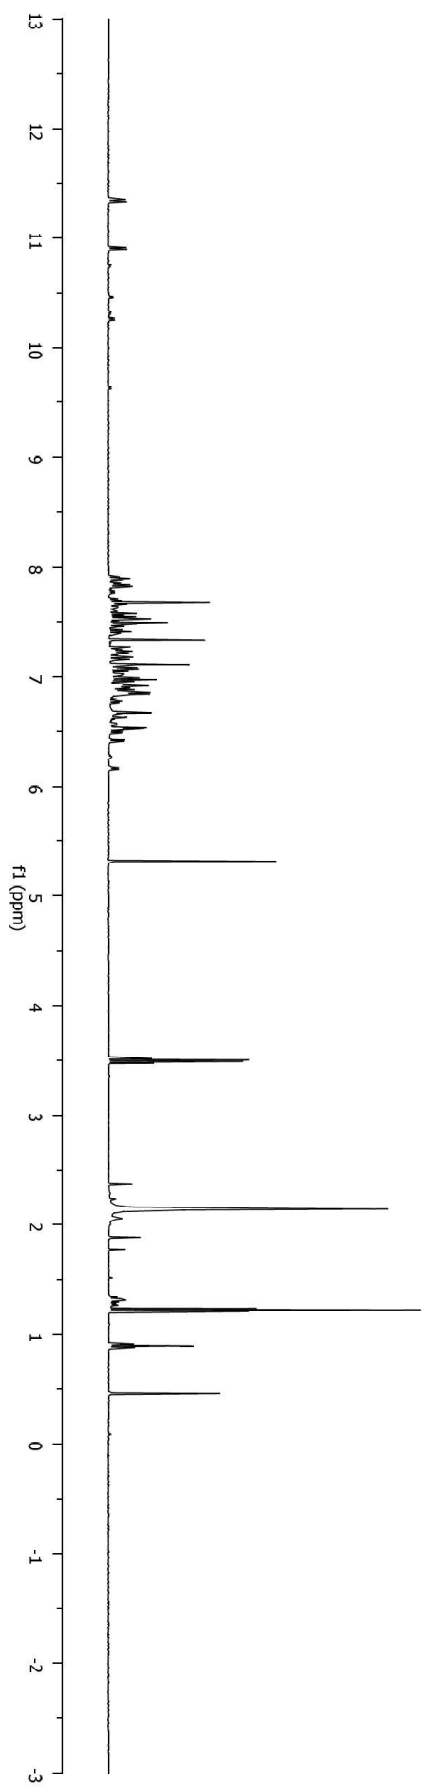

#### 4. X-Ray Structure Determination of Tetramethyl Ammonium Boroxinate Complex 7.

ORTEP  
2015  
01/10/2015

Figure 1. ORTEP Drawing of complex 7.

Figure 2

**Figure 2. ORTEP Drawing of complex 7 with Tetramethylammonium Removed.**

Table 1. Crystal data and structure refinement for complex 7.



---

Identification code wf081606  
 Empirical formula C<sub>59</sub> H<sub>49.25</sub> B<sub>3</sub> Cl<sub>3.25</sub> N O<sub>7</sub> S<sub>0.75</sub>  
 Formula weight 1055.93  
 Temperature 173(2) K  
 Wavelength 0.71073 Å  
 Crystal system Ortho.  
 Space group P2(1)2(1)2(1)  
 Unit cell dimensions  
     a = 14.311(3) Å  
     b = 18.360(4) Å  
     c = 21.044(4) Å  
     alpha = 90 deg.  
     beta = 90 deg.  
     gamma = 90 deg.  
 Volume 5529.1(19) Å<sup>3</sup>  
 Z 4  
 Density (calculated) 1.269 Mg/m<sup>3</sup>  
 Absorption coefficient 0.259 mm<sup>-1</sup>  
 F(000) 2194  
 Crystal size 0.7 x 0.2 x 0.2 mm  
 Theta range for data collection 1.47 to 28.29 deg.  
 Index ranges -19<=h<=19, -24<=k<=24, -28<=l<=28  
 Reflections collected / unique 64900 / 13458 [R(int) = 0.0660]  
 Completeness to theta = 28.29 99.1%  
 Refinement method Full-matrix least-squares on F<sup>2</sup>  
 Data / restraints / parameters 13458 / 6 / 661  
 Goodness-of-fit on F<sup>2</sup> 1.413  
 Final R indices [I>2sigma(I)] R1 = 0.0895, wR2 = 0.2242  
 R indices (all data) R1 = 0.1545, wR2 = 0.2450  
 Absolute structure parameter 0.14(14)  
 Largest diff. peak and hole 1.106 and -0.757 e.Å<sup>-3</sup>

Table 2. Atomic coordinates ( $\times 10^4$ ), equivalent isotropic displacement parameters ( $\text{\AA}^2 \times 10^3$ ), and occupancies for complex **7**.

| x     | y        | z        | U(eq)    | Occ.  |   |
|-------|----------|----------|----------|-------|---|
| O(1)  | 1640(2)  | 7637(1)  | 9684(1)  | 33(1) | 1 |
| C(2)  | 1377(3)  | 6997(2)  | 9408(2)  | 34(1) | 1 |
| C(3)  | 943(3)   | 6475(2)  | 9786(2)  | 34(1) | 1 |
| C(4)  | 832(3)   | 6638(2)  | 10483(2) | 31(1) | 1 |
| C(5)  | 361(3)   | 7296(2)  | 10646(2) | 32(1) | 1 |
| O(6)  | 104(2)   | 7743(1)  | 10159(1) | 32(1) | 1 |
| B(7)  | 856(3)   | 8146(2)  | 9834(2)  | 35(1) | 1 |
| O(8)  | 1261(2)  | 8704(1)  | 10258(1) | 37(1) | 1 |
| B(9)  | 1174(4)  | 9419(3)  | 10129(3) | 48(1) | 1 |
| O(10) | 780(3)   | 9672(1)  | 9587(2)  | 78(1) | 1 |
| B(11) | 431(4)   | 9167(3)  | 9145(3)  | 50(1) | 1 |
| O(12) | 453(2)   | 8455(1)  | 9259(1)  | 36(1) | 1 |
| O(13) | 1508(3)  | 9962(2)  | 10518(2) | 75(1) | 1 |
| C(14) | 1861(4)  | 9911(3)  | 11103(3) | 55(1) | 1 |
| C(15) | 1294(4)  | 9706(3)  | 11610(3) | 64(2) | 1 |
| C(16) | 1658(6)  | 9709(3)  | 12226(3) | 77(2) | 1 |
| C(17) | 2557(7)  | 9892(3)  | 12331(3) | 88(2) | 1 |
| C(18) | 3135(5)  | 10088(3) | 11820(4) | 85(2) | 1 |
| C(19) | 2771(4)  | 10109(3) | 11207(3) | 72(2) | 1 |
| O(20) | 57(3)    | 9496(2)  | 8626(2)  | 66(1) | 1 |
| C(21) | -252(4)  | 9135(2)  | 8084(2)  | 47(1) | 1 |
| C(22) | -1169(4) | 9245(3)  | 7902(2)  | 54(1) | 1 |
| C(23) | -1476(4) | 8935(3)  | 7339(3)  | 66(2) | 1 |
| C(24) | -901(4)  | 8524(3)  | 6972(2)  | 62(1) | 1 |
| C(25) | 25(4)    | 8428(3)  | 7156(3)  | 64(1) | 1 |
| C(26) | 353(4)   | 8725(3)  | 7723(2)  | 50(1) | 1 |
| C(27) | 1560(3)  | 6863(2)  | 8753(2)  | 33(1) | 1 |
| C(28) | 2068(3)  | 7373(2)  | 8335(2)  | 42(1) | 1 |

|       |          |         |          |       |   |
|-------|----------|---------|----------|-------|---|
| C(29) | 2594(3)  | 7981(3) | 8547(2)  | 49(1) | 1 |
| C(30) | 3056(4)  | 8413(3) | 8124(2)  | 54(1) | 1 |
| C(31) | 3028(4)  | 8281(3) | 7480(3)  | 65(2) | 1 |
| C(32) | 2546(4)  | 7714(3) | 7262(3)  | 63(2) | 1 |
| C(33) | 2071(4)  | 7232(3) | 7674(2)  | 52(1) | 1 |
| C(34) | 1626(4)  | 6581(3) | 7432(2)  | 60(2) | 1 |
| C(35) | 1229(4)  | 6088(3) | 7808(2)  | 55(1) | 1 |
| C(36) | 1198(3)  | 6214(2) | 8496(2)  | 39(1) | 1 |
| C(37) | 766(3)   | 5705(2) | 8882(2)  | 42(1) | 1 |
| C(38) | 624(3)   | 5805(2) | 9524(2)  | 36(1) | 1 |
| C(39) | 113(3)   | 5237(2) | 9894(2)  | 46(1) | 1 |
| C(40) | 330(4)   | 4494(3) | 9784(3)  | 63(1) | 1 |
| C(41) | -146(6)  | 3950(3) | 10105(4) | 88(2) | 1 |
| C(42) | -810(6)  | 4117(4) | 10519(4) | 93(2) | 1 |
| C(43) | -1064(5) | 4853(3) | 10639(3) | 75(2) | 1 |
| C(44) | -582(3)  | 5392(2) | 10325(2) | 47(1) | 1 |
| C(45) | 1161(3)  | 6183(2) | 10961(2) | 34(1) | 1 |
| C(46) | 1731(3)  | 5510(2) | 10834(2) | 40(1) | 1 |
| C(47) | 1533(4)  | 4870(3) | 11160(3) | 56(1) | 1 |
| C(48) | 2083(4)  | 4266(3) | 11086(3) | 74(2) | 1 |
| C(49) | 2833(4)  | 4265(3) | 10691(3) | 68(2) | 1 |
| C(50) | 3047(4)  | 4904(3) | 10352(2) | 54(1) | 1 |
| C(51) | 2488(3)  | 5500(3) | 10420(2) | 44(1) | 1 |
| C(52) | 1008(3)  | 6369(2) | 11586(2) | 39(1) | 1 |
| C(53) | 529(3)   | 7006(3) | 11752(2) | 43(1) | 1 |
| C(54) | 460(4)   | 7204(3) | 12415(2) | 53(1) | 1 |
| C(55) | 67(5)    | 7823(3) | 12591(2) | 68(2) | 1 |
| C(56) | -393(4)  | 8307(3) | 12133(2) | 56(1) | 1 |
| C(57) | -865(5)  | 8912(3) | 12342(3) | 70(2) | 1 |
| C(58) | -1334(5) | 9349(3) | 11932(3) | 77(2) | 1 |
| C(59) | -1348(4) | 9182(3) | 11296(3) | 56(1) | 1 |
| C(60) | -860(3)  | 8581(2) | 11066(2) | 47(1) | 1 |
| C(61) | -356(3)  | 8132(2) | 11478(2) | 42(1) | 1 |

|        |          |          |          |           |           |
|--------|----------|----------|----------|-----------|-----------|
| C(62)  | 170(3)   | 7486(2)  | 11289(2) | 36(1)     | 1         |
| N(101) | -1651(2) | 7163(2)  | 8792(2)  | 39(1)     | 1         |
| C(102) | -834(3)  | 7215(3)  | 8357(2)  | 52(1)     | 1         |
| C(103) | -1466(3) | 6644(3)  | 9314(2)  | 48(1)     | 1         |
| C(104) | -1810(3) | 7894(2)  | 9081(2)  | 51(1)     | 1         |
| C(105) | -2464(1) | 6937(1)  | 8430(1)  | 50(1)     | 1         |
| C(00)  | 556(1)   | 1189(1)  | 8694(1)  | 400(20)   | 0.914(5)  |
| Cl(1)  | -10(1)   | 1938(1)  | 9117(1)  | 113(1)    | 0.914(5)  |
| Cl(2)  | 1933(1)  | 1553(1)  | 8451(1)  | 211(2)    | 0.914(5)  |
| Cl(3)  | 5679(1)  | 3132(1)  | 9133(1)  | 198(3)    | 0.723(6)  |
| Cl(4)  | 3515(1)  | 3527(1)  | 9016(1)  | 375(8)    | 0.723(6)  |
| C(01)  | 4681(1)  | 3894(1)  | 9000(1)  | 168(8)    | 0.723(6)  |
| S(1)   | 2846(1)  | 12217(1) | 10425(1) | 351(8)    | 0.783(12) |
| C(04)  | 1390(1)  | 12563(1) | 10500(1) | 204(11)   | 0.783(12) |
| C(05)  | 3210(1)  | 12753(1) | 9755(1)  | 1790(150) | 0.783(12) |

---

U(eq) is defined as one third of the trace of the orthogonalized Uij tensor.

Table 3. Bond lengths [Å] and angles [deg] for complex **7**.

---

|            |          |
|------------|----------|
| O(1)-C(2)  | 1.364(5) |
| O(1)-B(7)  | 1.494(5) |
| C(2)-C(3)  | 1.392(6) |
| C(2)-C(27) | 1.425(6) |
| C(3)-C(38) | 1.424(6) |
| C(3)-C(4)  | 1.506(6) |
| C(4)-C(45) | 1.389(5) |

|             |           |
|-------------|-----------|
| C(4)-C(5)   | 1.425(6)  |
| C(5)-O(6)   | 1.363(5)  |
| C(5)-C(62)  | 1.425(6)  |
| O(6)-B(7)   | 1.475(5)  |
| B(7)-O(12)  | 1.455(5)  |
| B(7)-O(8)   | 1.476(6)  |
| O(8)-B(9)   | 1.346(6)  |
| B(9)-O(10)  | 1.355(6)  |
| B(9)-O(13)  | 1.375(6)  |
| O(10)-B(11) | 1.404(6)  |
| B(11)-O(12) | 1.330(6)  |
| B(11)-O(20) | 1.358(6)  |
| O(13)-C(14) | 1.333(6)  |
| C(14)-C(19) | 1.369(8)  |
| C(14)-C(15) | 1.392(8)  |
| C(15)-C(16) | 1.397(9)  |
| C(16)-C(17) | 1.348(11) |
| C(17)-C(18) | 1.404(11) |
| C(18)-C(19) | 1.392(9)  |
| O(20)-C(21) | 1.392(6)  |
| C(21)-C(26) | 1.376(7)  |
| C(21)-C(22) | 1.382(7)  |
| C(22)-C(23) | 1.388(8)  |
| C(23)-C(24) | 1.358(8)  |
| C(24)-C(25) | 1.391(8)  |
| C(25)-C(26) | 1.394(7)  |
| C(27)-C(36) | 1.407(6)  |
| C(27)-C(28) | 1.475(6)  |
| C(28)-C(33) | 1.417(7)  |
| C(28)-C(29) | 1.417(7)  |
| C(29)-C(30) | 1.363(7)  |
| C(30)-C(31) | 1.378(8)  |
| C(31)-C(32) | 1.331(8)  |

|             |           |
|-------------|-----------|
| C(32)-C(33) | 1.413(7)  |
| C(33)-C(34) | 1.447(8)  |
| C(34)-C(35) | 1.329(8)  |
| C(35)-C(36) | 1.468(6)  |
| C(36)-C(37) | 1.383(6)  |
| C(37)-C(38) | 1.379(6)  |
| C(38)-C(39) | 1.492(6)  |
| C(39)-C(44) | 1.377(7)  |
| C(39)-C(40) | 1.418(7)  |
| C(40)-C(41) | 1.385(8)  |
| C(41)-C(42) | 1.326(10) |
| C(42)-C(43) | 1.422(10) |
| C(43)-C(44) | 1.374(7)  |
| C(45)-C(52) | 1.376(6)  |
| C(45)-C(46) | 1.506(6)  |
| C(46)-C(51) | 1.390(6)  |
| C(46)-C(47) | 1.389(6)  |
| C(47)-C(48) | 1.369(8)  |
| C(48)-C(49) | 1.357(8)  |
| C(49)-C(50) | 1.407(8)  |
| C(50)-C(51) | 1.363(7)  |
| C(52)-C(53) | 1.400(6)  |
| C(53)-C(62) | 1.410(6)  |
| C(53)-C(54) | 1.444(6)  |
| C(54)-C(55) | 1.321(8)  |
| C(55)-C(56) | 1.468(8)  |
| C(56)-C(57) | 1.373(8)  |
| C(56)-C(61) | 1.415(7)  |
| C(57)-C(58) | 1.357(9)  |
| C(58)-C(59) | 1.373(8)  |
| C(59)-C(60) | 1.392(6)  |
| C(60)-C(61) | 1.397(7)  |
| C(61)-C(62) | 1.460(6)  |

|                 |          |
|-----------------|----------|
| N(101)-C(105)   | 1.452(4) |
| N(101)-C(103)   | 1.478(6) |
| N(101)-C(102)   | 1.488(6) |
| N(101)-C(104)   | 1.490(6) |
| C(00)-Cl(1)     | 1.8268   |
| C(00)-Cl(2)     | 2.1437   |
| Cl(3)-C(04)#1   | 1.805(3) |
| Cl(3)-C(01)     | 2.0188   |
| Cl(4)-C(01)     | 1.7999   |
| Cl(4)-C(05)#2   | 2.1514   |
| S(1)-C(05)      | 1.7973   |
| S(1)-C(04)      | 2.1840   |
| C(04)-Cl(3)#3   | 1.805(3) |
| C(05)-Cl(4)#4   | 2.1513   |
| C(2)-O(1)-B(7)  | 115.0(3) |
| O(1)-C(2)-C(3)  | 118.2(3) |
| O(1)-C(2)-C(27) | 120.7(4) |
| C(3)-C(2)-C(27) | 121.1(4) |
| C(2)-C(3)-C(38) | 121.1(4) |
| C(2)-C(3)-C(4)  | 117.9(3) |
| C(38)-C(3)-C(4) | 121.0(4) |
| C(45)-C(4)-C(5) | 119.7(4) |
| C(45)-C(4)-C(3) | 123.4(4) |
| C(5)-C(4)-C(3)  | 116.9(3) |
| O(6)-C(5)-C(4)  | 117.2(3) |
| O(6)-C(5)-C(62) | 121.0(4) |
| C(4)-C(5)-C(62) | 121.8(4) |
| C(5)-O(6)-B(7)  | 117.0(3) |
| O(12)-B(7)-O(8) | 112.8(3) |
| O(12)-B(7)-O(6) | 107.0(3) |
| O(8)-B(7)-O(6)  | 110.8(3) |
| O(12)-B(7)-O(1) | 111.5(3) |
| O(8)-B(7)-O(1)  | 105.4(3) |

|                   |          |
|-------------------|----------|
| O(6)-B(7)-O(1)    | 109.4(3) |
| B(9)-O(8)-B(7)    | 121.2(4) |
| O(8)-B(9)-O(10)   | 122.8(4) |
| O(8)-B(9)-O(13)   | 123.7(5) |
| O(10)-B(9)-O(13)  | 113.4(4) |
| B(9)-O(10)-B(11)  | 118.6(3) |
| O(12)-B(11)-O(20) | 126.2(5) |
| O(12)-B(11)-O(10) | 121.4(4) |
| O(20)-B(11)-O(10) | 112.3(4) |
| B(11)-O(12)-B(7)  | 122.8(4) |
| C(14)-O(13)-B(9)  | 129.1(4) |
| O(13)-C(14)-C(19) | 119.3(6) |
| O(13)-C(14)-C(15) | 120.3(5) |
| C(19)-C(14)-C(15) | 120.2(6) |
| C(14)-C(15)-C(16) | 119.5(6) |
| C(17)-C(16)-C(15) | 120.7(7) |
| C(16)-C(17)-C(18) | 120.0(6) |
| C(19)-C(18)-C(17) | 119.8(6) |
| C(14)-C(19)-C(18) | 119.8(6) |
| B(11)-O(20)-C(21) | 124.9(4) |
| C(26)-C(21)-C(22) | 121.7(5) |
| C(26)-C(21)-O(20) | 120.9(5) |
| C(22)-C(21)-O(20) | 117.3(5) |
| C(21)-C(22)-C(23) | 118.5(5) |
| C(24)-C(23)-C(22) | 121.4(5) |
| C(23)-C(24)-C(25) | 119.4(5) |
| C(26)-C(25)-C(24) | 120.6(5) |
| C(21)-C(26)-C(25) | 118.4(5) |
| C(36)-C(27)-C(2)  | 116.7(4) |
| C(36)-C(27)-C(28) | 119.4(4) |
| C(2)-C(27)-C(28)  | 123.8(4) |
| C(33)-C(28)-C(29) | 116.8(4) |
| C(33)-C(28)-C(27) | 118.0(4) |



|                   |          |
|-------------------|----------|
| C(29)-C(28)-C(27) | 125.1(4) |
| C(30)-C(29)-C(28) | 120.7(5) |
| C(29)-C(30)-C(31) | 121.8(5) |
| C(32)-C(31)-C(30) | 119.4(5) |
| C(31)-C(32)-C(33) | 121.9(5) |
| C(32)-C(33)-C(28) | 119.3(5) |
| C(32)-C(33)-C(34) | 120.9(5) |
| C(28)-C(33)-C(34) | 119.7(4) |
| C(35)-C(34)-C(33) | 122.8(4) |
| C(34)-C(35)-C(36) | 119.6(5) |
| C(37)-C(36)-C(27) | 120.8(4) |
| C(37)-C(36)-C(35) | 119.1(4) |
| C(27)-C(36)-C(35) | 120.0(4) |
| C(38)-C(37)-C(36) | 123.5(4) |
| C(37)-C(38)-C(3)  | 116.6(4) |
| C(37)-C(38)-C(39) | 119.4(4) |
| C(3)-C(38)-C(39)  | 124.0(4) |
| C(44)-C(39)-C(40) | 117.6(4) |
| C(44)-C(39)-C(38) | 123.7(4) |
| C(40)-C(39)-C(38) | 118.7(4) |
| C(41)-C(40)-C(39) | 120.5(6) |
| C(42)-C(41)-C(40) | 120.3(6) |
| C(41)-C(42)-C(43) | 121.4(6) |
| C(44)-C(43)-C(42) | 118.1(6) |
| C(39)-C(44)-C(43) | 122.1(5) |
| C(52)-C(45)-C(4)  | 119.3(4) |
| C(52)-C(45)-C(46) | 117.4(4) |
| C(4)-C(45)-C(46)  | 123.2(4) |
| C(51)-C(46)-C(47) | 117.3(4) |
| C(51)-C(46)-C(45) | 123.0(4) |
| C(47)-C(46)-C(45) | 119.7(4) |
| C(48)-C(47)-C(46) | 120.7(5) |
| C(49)-C(48)-C(47) | 121.8(5) |

|                      |           |
|----------------------|-----------|
| C(48)-C(49)-C(50)    | 118.7(5)  |
| C(51)-C(50)-C(49)    | 119.3(5)  |
| C(50)-C(51)-C(46)    | 122.2(4)  |
| C(45)-C(52)-C(53)    | 121.6(4)  |
| C(52)-C(53)-C(62)    | 121.9(4)  |
| C(52)-C(53)-C(54)    | 119.0(4)  |
| C(62)-C(53)-C(54)    | 119.0(4)  |
| C(55)-C(54)-C(53)    | 121.1(5)  |
| C(54)-C(55)-C(56)    | 121.8(5)  |
| C(57)-C(56)-C(61)    | 121.0(5)  |
| C(57)-C(56)-C(55)    | 120.0(5)  |
| C(61)-C(56)-C(55)    | 119.1(4)  |
| C(58)-C(57)-C(56)    | 121.1(5)  |
| C(57)-C(58)-C(59)    | 119.7(5)  |
| C(58)-C(59)-C(60)    | 120.6(6)  |
| C(59)-C(60)-C(61)    | 120.7(5)  |
| C(60)-C(61)-C(56)    | 116.8(4)  |
| C(60)-C(61)-C(62)    | 125.2(4)  |
| C(56)-C(61)-C(62)    | 117.9(4)  |
| C(53)-C(62)-C(5)     | 115.7(4)  |
| C(53)-C(62)-C(61)    | 120.5(4)  |
| C(5)-C(62)-C(61)     | 123.8(4)  |
| C(105)-N(101)-C(103) | 110.4(3)  |
| C(105)-N(101)-C(102) | 109.0(3)  |
| C(103)-N(101)-C(102) | 110.9(4)  |
| C(105)-N(101)-C(104) | 110.4(3)  |
| C(103)-N(101)-C(104) | 107.8(4)  |
| C(102)-N(101)-C(104) | 108.3(3)  |
| Cl(1)-C(00)-Cl(2)    | 106.8     |
| C(04)#1-Cl(3)-C(01)  | 161.38(8) |
| C(01)-Cl(4)-C(05)#2  | 116.7     |
| Cl(4)-C(01)-Cl(3)    | 113.2     |
| C(05)-S(1)-C(04)     | 100.0     |

Cl(3)#3-C(04)-S(1) 111.27(6)  
S(1)-C(05)-Cl(4)#4 171.1

---

Symmetry transformations used to generate equivalent atoms:

#1  $x+1/2, -y+3/2, -z+2$  #2  $x, y-1, z$  #3  $x-1/2, -y+3/2, -z+2$

#4  $x, y+1, z$

Table 4. Anisotropic displacement parameters ( $\text{Å}^2 \times 10^3$ ) for complex **7**.

---

| U11   | U22    | U33   | U23   | U13   | U12          |
|-------|--------|-------|-------|-------|--------------|
| O(1)  | 32(2)  | 28(1) | 37(2) | 2(1)  | 0(1) -2(1)   |
| C(2)  | 33(2)  | 35(2) | 35(2) | 2(2)  | 1(2) 10(2)   |
| C(3)  | 35(2)  | 32(2) | 35(2) | -1(2) | -4(2) 6(2)   |
| C(4)  | 28(2)  | 34(2) | 32(2) | 1(2)  | 4(2) -3(2)   |
| C(5)  | 28(2)  | 35(2) | 32(2) | 5(2)  | -1(2) -6(2)  |
| O(6)  | 34(2)  | 29(1) | 34(1) | 0(1)  | 2(1) 3(1)    |
| B(7)  | 37(3)  | 31(2) | 37(3) | 6(2)  | 7(2) 3(2)    |
| O(8)  | 38(2)  | 31(2) | 41(2) | -3(1) | 1(1) -4(1)   |
| B(9)  | 59(3)  | 38(3) | 46(3) | -7(2) | -7(3) -6(3)  |
| O(10) | 136(3) | 28(1) | 71(2) | 1(1)  | -42(2) -2(2) |

---

|       |        |       |        |        |        |        |
|-------|--------|-------|--------|--------|--------|--------|
| B(11) | 60(3)  | 31(3) | 58(3)  | 6(3)   | -10(3) | 2(3)   |
| O(12) | 38(2)  | 31(1) | 38(2)  | 1(1)   | -1(1)  | -1(1)  |
| O(13) | 116(3) | 41(2) | 69(2)  | -7(2)  | -29(2) | -19(2) |
| C(14) | 63(3)  | 31(2) | 71(3)  | -10(2) | -8(3)  | -3(2)  |
| C(15) | 62(3)  | 43(3) | 85(4)  | -11(3) | 9(3)   | 5(3)   |
| C(16) | 121(6) | 53(3) | 56(4)  | -13(2) | 2(4)   | 21(3)  |
| C(17) | 133(7) | 58(4) | 72(4)  | -28(3) | -41(5) | 17(4)  |
| C(18) | 55(4)  | 60(4) | 140(7) | -45(4) | -37(4) | 5(3)   |
| C(19) | 73(4)  | 44(3) | 98(5)  | -28(3) | 2(4)   | -8(3)  |
| O(20) | 106(3) | 39(2) | 54(2)  | 4(2)   | -25(2) | 1(2)   |
| C(21) | 67(3)  | 34(2) | 40(3)  | 11(2)  | -6(2)  | -2(2)  |
| C(22) | 56(3)  | 59(3) | 46(3)  | 11(2)  | -1(2)  | 5(3)   |
| C(23) | 64(4)  | 56(3) | 78(4)  | 20(3)  | -13(3) | 5(3)   |
| C(24) | 80(4)  | 64(3) | 41(3)  | 5(2)   | -13(3) | 1(3)   |
| C(25) | 63(4)  | 70(4) | 57(3)  | 8(3)   | 20(3)  | -1(3)  |
| C(26) | 48(3)  | 51(3) | 52(3)  | 13(2)  | 3(2)   | -6(2)  |
| C(27) | 32(2)  | 35(2) | 33(2)  | 2(2)   | 4(2)   | 10(2)  |
| C(28) | 43(3)  | 39(2) | 45(3)  | 9(2)   | 6(2)   | 15(2)  |
| C(29) | 49(3)  | 48(3) | 49(3)  | 8(2)   | 12(2)  | 12(2)  |
| C(30) | 51(3)  | 44(3) | 68(3)  | 13(2)  | 23(2)  | 4(2)   |
| C(31) | 79(4)  | 49(3) | 67(4)  | 12(3)  | 38(3)  | 15(3)  |
| C(32) | 73(4)  | 65(4) | 50(3)  | 13(3)  | 29(3)  | 19(3)  |
| C(33) | 54(3)  | 65(3) | 38(3)  | 5(2)   | 14(2)  | 15(3)  |
| C(34) | 75(4)  | 78(4) | 27(2)  | 1(3)   | 12(2)  | 28(3)  |
| C(35) | 62(3)  | 52(3) | 50(3)  | -15(2) | -8(3)  | 21(3)  |
| C(36) | 40(2)  | 40(2) | 37(2)  | 0(2)   | 5(2)   | 12(2)  |
| C(37) | 41(2)  | 38(2) | 45(3)  | -7(2)  | -4(2)  | 9(2)   |
| C(38) | 27(2)  | 32(2) | 49(3)  | -1(2)  | -4(2)  | 6(2)   |
| C(39) | 51(3)  | 33(2) | 55(3)  | 1(2)   | -14(2) | -4(2)  |
| C(40) | 78(4)  | 36(3) | 76(3)  | 8(3)   | -1(3)  | -1(3)  |
| C(41) | 105(6) | 42(3) | 118(5) | 5(3)   | 8(5)   | -12(3) |
| C(42) | 110(6) | 58(4) | 112(5) | 31(4)  | 22(5)  | -25(4) |
| C(43) | 81(4)  | 66(4) | 80(4)  | 13(3)  | 12(3)  | -24(3) |

|        |           |           |           |            |            |           |
|--------|-----------|-----------|-----------|------------|------------|-----------|
| C(44)  | 49(3)     | 38(2)     | 54(3)     | 3(2)       | -1(2)      | -7(2)     |
| C(45)  | 33(2)     | 33(2)     | 36(2)     | 5(2)       | 1(2)       | -4(2)     |
| C(46)  | 43(3)     | 39(2)     | 40(2)     | 4(2)       | 1(2)       | 1(2)      |
| C(47)  | 59(3)     | 42(3)     | 65(3)     | 14(2)      | -2(3)      | 5(2)      |
| C(48)  | 77(4)     | 61(4)     | 84(4)     | 31(3)      | 12(4)      | 15(3)     |
| C(49)  | 80(4)     | 57(3)     | 68(3)     | 9(3)       | 1(3)       | 31(3)     |
| C(50)  | 49(3)     | 57(3)     | 56(3)     | 4(2)       | 5(2)       | 19(3)     |
| C(51)  | 50(3)     | 43(3)     | 39(2)     | 4(2)       | 1(2)       | 4(2)      |
| C(52)  | 38(2)     | 44(3)     | 35(2)     | 12(2)      | 2(2)       | -6(2)     |
| C(53)  | 31(2)     | 61(3)     | 35(2)     | 4(2)       | 7(2)       | -14(2)    |
| C(54)  | 57(3)     | 65(3)     | 36(2)     | -2(2)      | 8(2)       | -7(3)     |
| C(55)  | 87(4)     | 77(4)     | 39(3)     | -16(3)     | 20(3)      | -13(3)    |
| C(56)  | 58(3)     | 59(3)     | 51(3)     | -15(3)     | 23(2)      | -10(3)    |
| C(57)  | 93(5)     | 63(3)     | 56(3)     | -12(3)     | 29(3)      | -3(3)     |
| C(58)  | 83(4)     | 44(3)     | 105(5)    | -19(3)     | 48(4)      | -2(3)     |
| C(59)  | 52(3)     | 45(3)     | 72(3)     | -9(3)      | 15(3)      | 5(2)      |
| C(60)  | 35(2)     | 46(3)     | 61(3)     | -7(2)      | 13(2)      | -2(2)     |
| C(61)  | 35(2)     | 44(2)     | 46(3)     | -9(2)      | 10(2)      | -10(2)    |
| C(62)  | 31(2)     | 37(2)     | 41(2)     | -2(2)      | 7(2)       | -3(2)     |
| N(101) | 28(2)     | 34(2)     | 55(2)     | 2(2)       | 1(2)       | 3(1)      |
| C(102) | 39(3)     | 56(3)     | 63(3)     | -4(2)      | 8(2)       | 0(2)      |
| C(103) | 40(3)     | 44(3)     | 59(3)     | 6(2)       | -2(2)      | 0(2)      |
| C(104) | 45(3)     | 42(3)     | 65(3)     | -4(2)      | -1(2)      | 3(2)      |
| C(105) | 38(3)     | 53(3)     | 58(3)     | -4(2)      | -2(2)      | -5(2)     |
| C(00)  | 530(40)   | 38(6)     | 620(40)   | -2(12)     | -420(40)   | -15(12)   |
| Cl(1)  | 132(2)    | 107(2)    | 99(2)     | 10(1)      | -12(1)     | -43(2)    |
| Cl(2)  | 340(6)    | 156(3)    | 136(2)    | -1(2)      | 26(3)      | 107(4)    |
| Cl(3)  | 260(6)    | 230(6)    | 103(3)    | -14(3)     | 49(3)      | -41(5)    |
| Cl(4)  | 437(14)   | 547(19)   | 140(5)    | -188(8)    | -8(7)      | 93(13)    |
| C(01)  | 231(19)   | 96(9)     | 177(14)   | -52(9)     | 102(14)    | -87(11)   |
| S(1)   | 446(14)   | 243(8)    | 364(12)   | -191(8)    | 244(11)    | -158(9)   |
| C(04)  | 340(30)   | 80(8)     | 188(15)   | -10(9)     | -149(18)   | 12(11)    |
| C(05)  | 2000(200) | 2000(180) | 1380(140) | -1000(150) | -1000(150) | 2000(190) |

---

The anisotropic displacement factor exponent takes the form:

$$-2 \pi^2 [ h^2 a^2 U_{11} + \dots + 2 h k a^* b^* U_{12} ]$$

Table 5. Hydrogen coordinates (  $\times 10^4$ ), isotropic displacement parameters ( $\text{Å}^2 \times 10^3$ ), and occupancies for complex **7**.

---

| x      | y     | z     | U(eq) | Occ. |   |
|--------|-------|-------|-------|------|---|
| H(15A) | 677   | 9569  | 11539 | 76   | 1 |
| H(16A) | 1277  | 9583  | 12566 | 92   | 1 |
| H(17A) | 2794  | 9889  | 12743 | 105  | 1 |
| H(18A) | 3759  | 10204 | 11891 | 102  | 1 |
| H(19A) | 3144  | 10257 | 10869 | 86   | 1 |
| H(22A) | -1571 | 9521  | 8152  | 64   | 1 |
| H(23A) | -2090 | 9011  | 7209  | 79   | 1 |
| H(24A) | -1123 | 8309  | 6602  | 74   | 1 |
| H(25A) | 428   | 8162  | 6898  | 76   | 1 |
| H(26A) | 966   | 8649  | 7854  | 61   | 1 |
| H(29A) | 2624  | 8086  | 8979  | 59   | 1 |
| H(30A) | 3400  | 8806  | 8275  | 65   | 1 |

---

|        |       |      |       |     |   |
|--------|-------|------|-------|-----|---|
| H(31A) | 3344  | 8586 | 7200  | 78  | 1 |
| H(32A) | 2521  | 7633 | 6826  | 75  | 1 |
| H(34A) | 1618  | 6504 | 6995  | 72  | 1 |
| H(35A) | 972   | 5667 | 7636  | 65  | 1 |
| H(37A) | 561   | 5273 | 8699  | 50  | 1 |
| H(40A) | 795   | 4372 | 9495  | 76  | 1 |
| H(41A) | 1     | 3464 | 10029 | 106 | 1 |
| H(42A) | -1117 | 3746 | 10735 | 112 | 1 |
| H(43)  | -1541 | 4967 | 10923 | 90  | 1 |
| H(44A) | -731  | 5876 | 10407 | 56  | 1 |
| H(47A) | 1021  | 4852 | 11432 | 67  | 1 |
| H(48A) | 1939  | 3845 | 11312 | 89  | 1 |
| H(49A) | 3198  | 3849 | 10645 | 82  | 1 |
| H(50A) | 3564  | 4920 | 10085 | 65  | 1 |
| H(51A) | 2618  | 5915 | 10182 | 53  | 1 |
| H(52A) | 1228  | 6064 | 11906 | 47  | 1 |
| H(54A) | 697   | 6891 | 12722 | 63  | 1 |
| H(55A) | 83    | 7955 | 13018 | 81  | 1 |
| H(57A) | -864  | 9024 | 12773 | 84  | 1 |
| H(58A) | -1644 | 9761 | 12080 | 93  | 1 |
| H(59A) | -1687 | 9472 | 11017 | 68  | 1 |
| H(60A) | -869  | 8478 | 10633 | 57  | 1 |
| H(10B) | -972  | 7550 | 8020  | 79  | 1 |
| H(10C) | -703  | 6743 | 8181  | 79  | 1 |
| H(10D) | -299  | 7383 | 8590  | 79  | 1 |
| H(10E) | -1998 | 6625 | 9591  | 72  | 1 |
| H(10F) | -928  | 6801 | 9550  | 72  | 1 |
| H(10G) | -1352 | 6169 | 9140  | 72  | 1 |
| H(10H) | -2348 | 7875 | 9353  | 76  | 1 |
| H(10I) | -1914 | 8245 | 8750  | 76  | 1 |
| H(10J) | -1272 | 8033 | 9324  | 76  | 1 |
| H(10K) | -3001 | 6923 | 8703  | 75  | 1 |
| H(10L) | -2357 | 6461 | 8255  | 75  | 1 |

|        |       |      |      |     |          |
|--------|-------|------|------|-----|----------|
| H(10M) | -2573 | 7277 | 8091 | 75  | 1        |
| H(00A) | 207   | 1067 | 8314 | 477 | 0.914(5) |
| H(00B) | 588   | 761  | 8963 | 477 | 0.914(5) |
| H(01A) | 4738  | 4262 | 9329 | 201 | 0.723(6) |
| H(01B) | 4784  | 4130 | 8594 | 201 | 0.723(6) |

---



## 5. Preparation of Dimethylaminopyridinium VAPOL Boroxinate Complex 8.

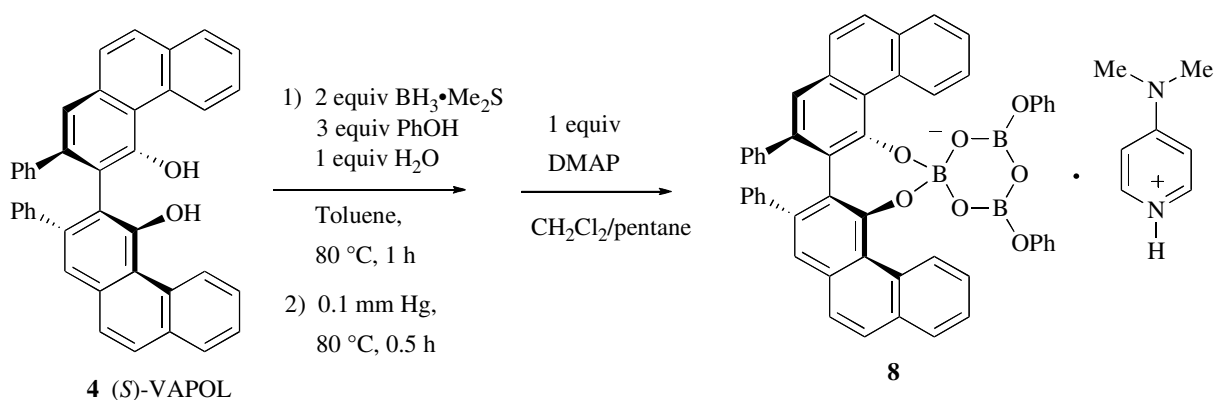

A flame dried 25 mL pear-shaped flask that had its 14/20 joint replaced by a high vacuum threaded T-shaped Teflon valve and which contained a stir bar was cooled under argon to room temperature and charged with (*S*)-VAPOL (108 mg, 0.2 mmol), PhOH (56.4 mg, 0.6 mol), 200  $\mu\text{L}$   $\text{BH}_3\text{Me}_2\text{S}$  (0.4 mmol) and 4 mL toluene, consecutively. To the solution was added deionized water (3.6  $\mu\text{L}$ , 0.2 mmol). The flask was sealed and heated to 80 °C for 1 h. The volatile materials were removed via high vacuum and left under high vacuum at 80 °C for 0.5 h yielding a mixture of mesoborate **5** and pyroborate **6** as described above. After cooling, the flask containing **5** and **6** was transferred into a glove box. To the catalyst was added dimethylaminopyridine (DMAP) (24.4 mg, 0.2 mmol) and 4 mL  $\text{CH}_2\text{Cl}_2$ . To the solution was added pentane until a permanent precipitate appeared. A small amount of  $\text{CH}_2\text{Cl}_2$  was added to the mixture until a clear solution was obtained. The solution was then filtered through glass fiber in a pipette. The colorless solution was collected in a 20 mL vial and capped. The vial was allowed to stand in the glove box overnight. Colorless crystals appeared inside the vial. These crystals were of X-ray quality and could be subject to crystallographic study directly and the quality of the crystals rapidly deteriorated in the absence of solvent. Decanting the mother solution followed by two washes with a 1:1 mixture  $\text{CH}_2\text{Cl}_2/\text{pentane}$  afforded complex **8** (42 mg, 23% yield) as colorless crystals. Spectral data for complex **8**:  $^1\text{H}$  NMR ( $\text{CD}_2\text{Cl}_2$ , 500 MHz)  $\delta$  2.66 (s, 6H), 5.73 (d, 2H,  $J = 7.0$  Hz), 6.23-6.25 (m, 4H), 6.39 (d, 4H,  $J = 8.0$  Hz), 6.45 (t, 2H,  $J$

= 7.0 Hz), 6.70-6.74 (m, 6H), 6.82 (t, 4H,  $J = 8.0$  Hz), 6.97 (t, 2H,  $J = 7.5$  Hz), 7.11 (s, 2H), 7.60 (d, 2H,  $J = 9.0$  Hz), 7.67 (t, 2H,  $J = 8.0$  Hz), 7.76-7.78 (m, 4H), 7.98 (d, 2H,  $J = 8.0$  Hz), 10.41 (d, 2H,  $J = 8.0$  Hz), 12.32 (s, br, 1H);  $^{13}\text{C}$  NMR ( $\text{CD}_2\text{Cl}_2$ , 125 MHz)  $\delta$  39.93, 105.87, 120.95, 122.69, 123.35, 123.49, 126.26, 126.59, 127.18, 127.70, 127.90, 127.93, 128.75, 128.82, 129.19, 129.58, 129.89, 132.39, 133.58, 134.23, 138.28, 141.36, 141.67, 154.20, 156.59, 156.74.  $^{11}\text{B}$  NMR ( $\text{CD}_2\text{Cl}_2$ , 500 MHz)  $\delta$  5.54 (s, 1B), 19.31 (s, br, 2B). Mass spectrum (MALDI, negative),  $m/z$  (% rel intensity) 803  $\text{M}^+$  –  $\text{C}_7\text{H}_{11}\text{N}_2$  (100), 727 (10), 407 (8); HRMS  $m/z$  calcd for  $\text{C}_{52}\text{H}_{34}\text{B}_3\text{O}_7$  803.2584; found 803.2554. The  $^1\text{H}$ ,  $^{11}\text{B}$ ,  $^{13}\text{C}$  NMR spectra are given below and are labeled as VAPOL\_B3\_DMAP. The x-ray structural data is also given below.

YAPOL\_B3\_DMAP  
1H NMR

— 12.32

10.42  
10.40  
10.40

7.99  
7.98  
7.97  
7.66  
7.65  
7.65  
7.65  
7.62  
7.60

— 7.11  
— 6.96

6.73  
6.71  
6.71  
6.69  
6.40  
6.38

6.25  
6.24  
6.23

5.74  
5.73

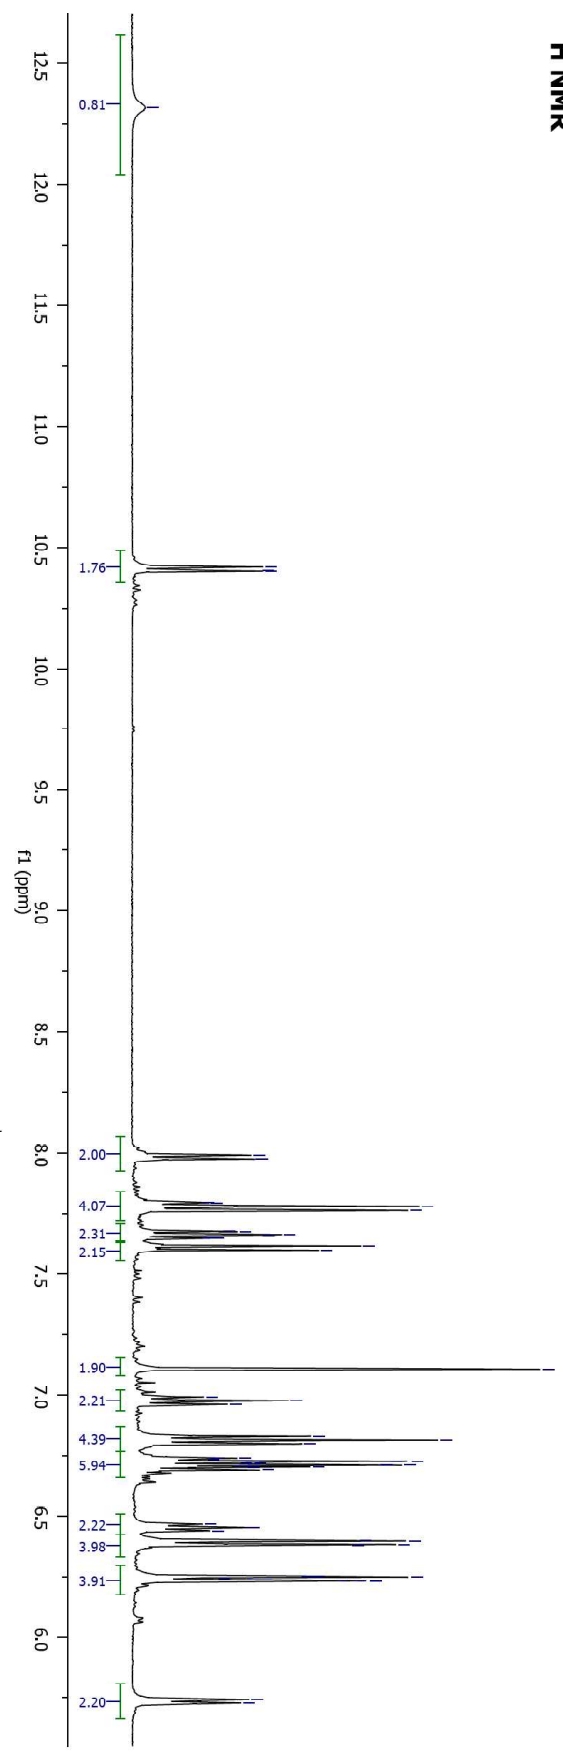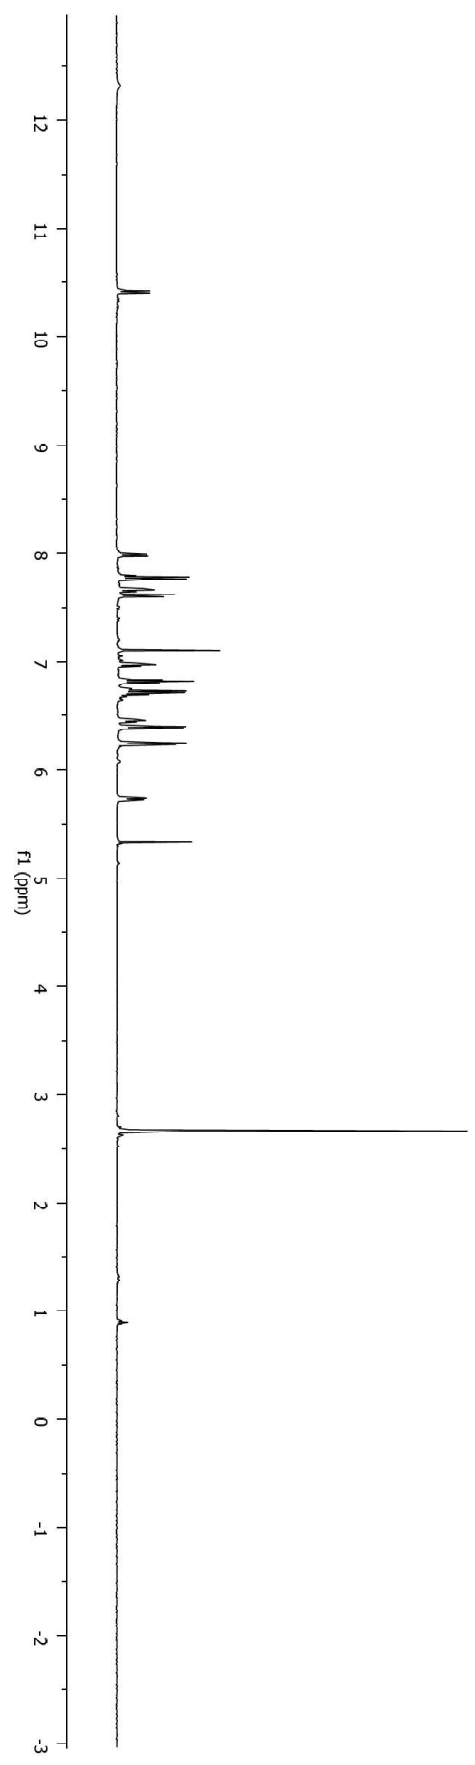

YAPOL\_B3\_DMAP  
<sup>13</sup>C NMR

156.72  
156.57  
154.19

141.65  
141.35

138.27

134.21  
133.57  
132.37

129.88  
129.18  
128.81  
129.74  
129.62

127.69  
127.17  
126.58  
126.25

123.48  
123.34  
122.68

120.94

105.86

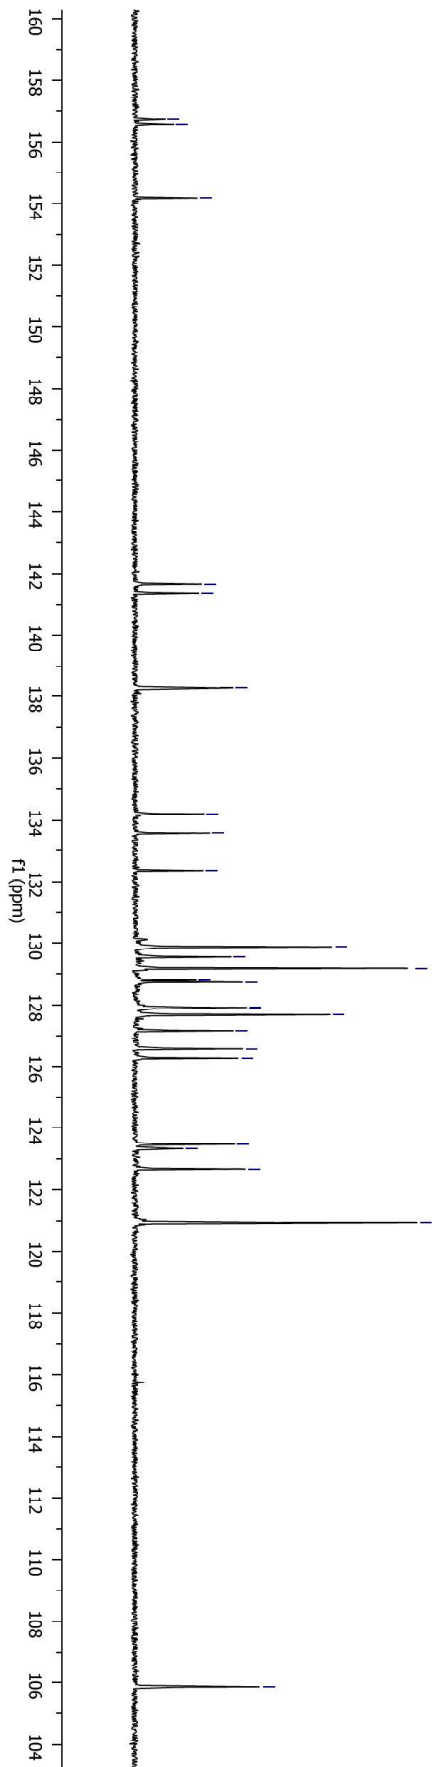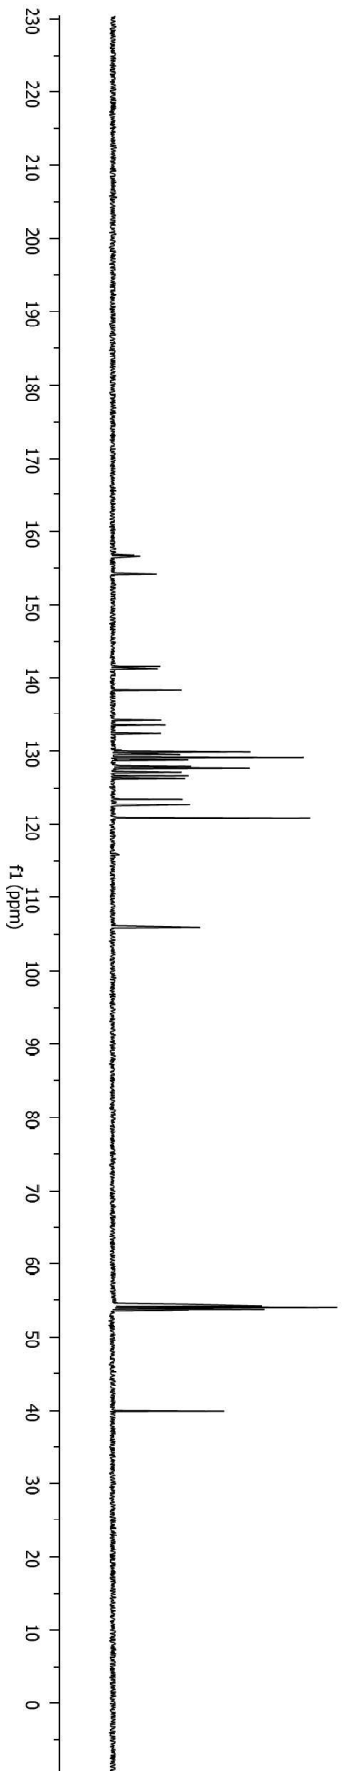

YAPOL\_B3\_DMAP  
1H NMR

19.33

5.54

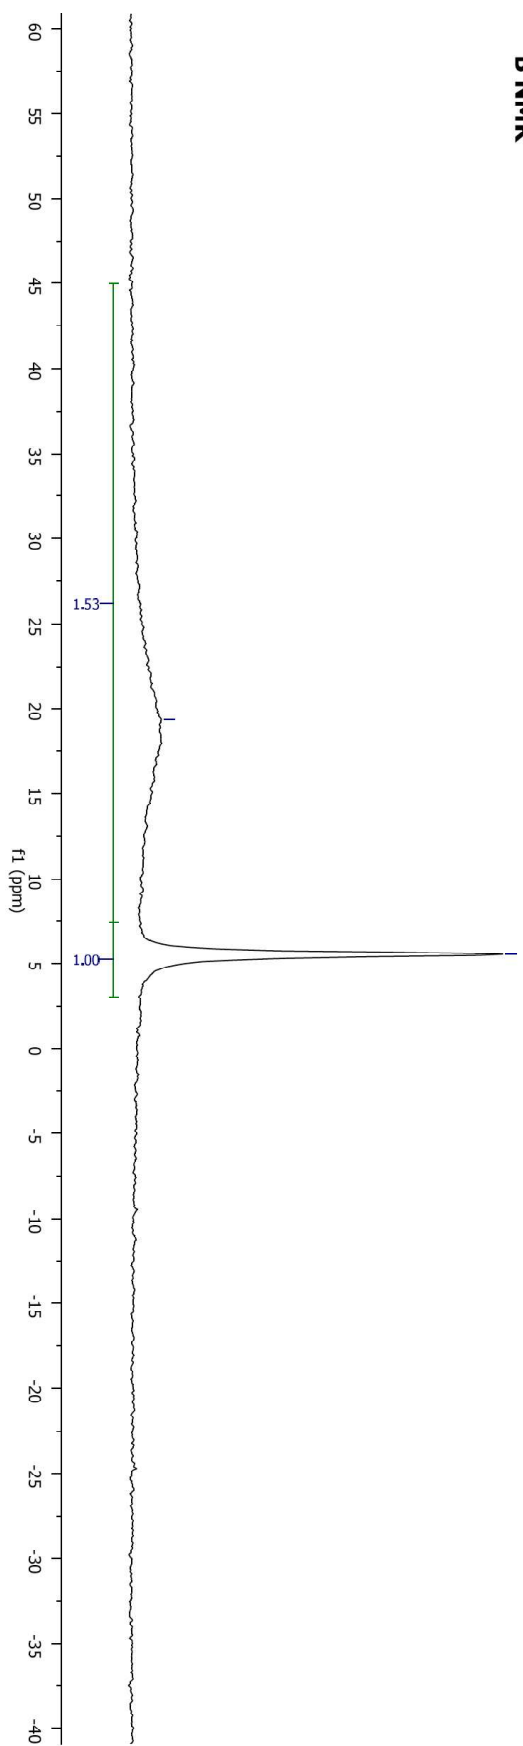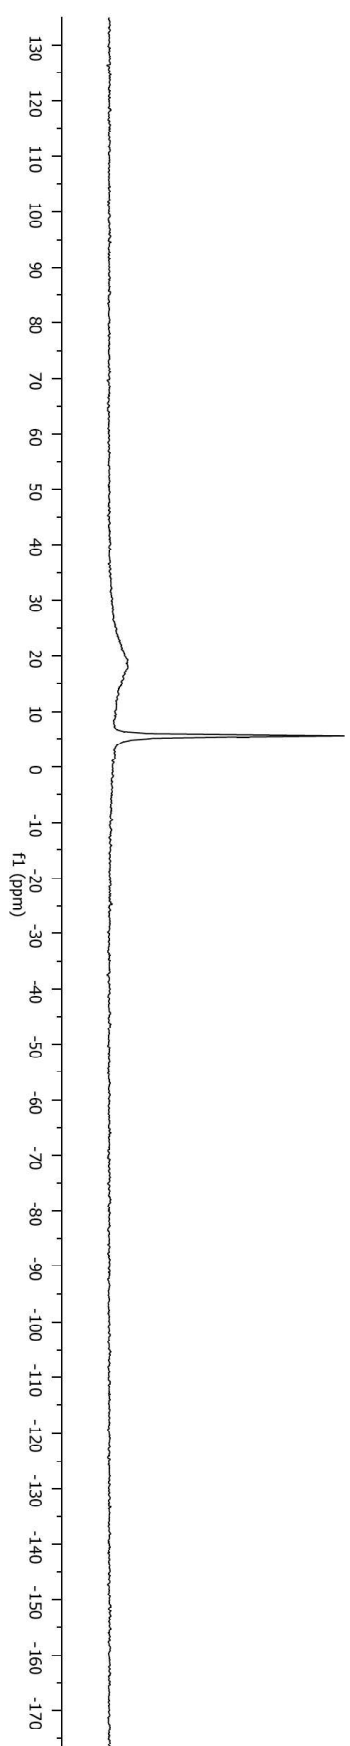

6. X-Ray Structure Determination of Dimethylpyridinium Boroxinate Complex 8.

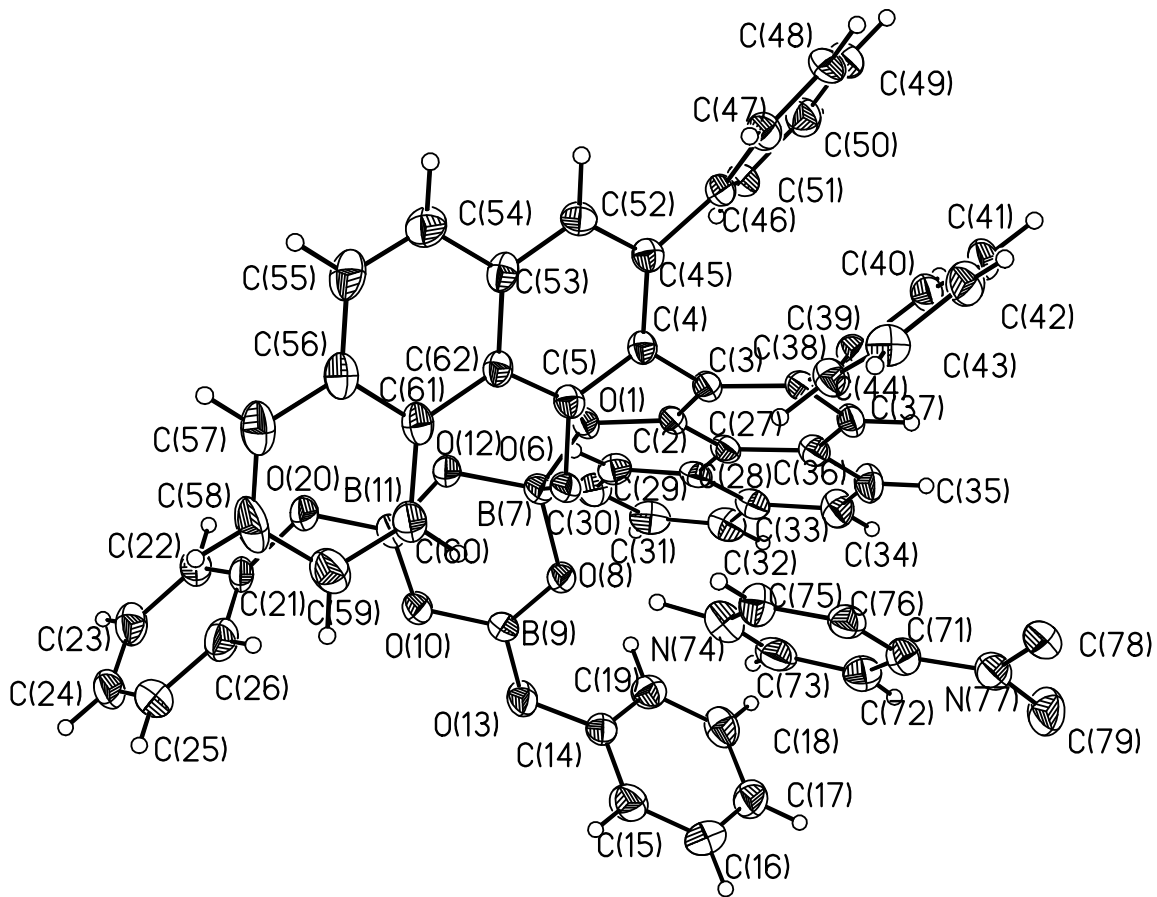

Figure 3. ORTEP Drawing of complex 8.

Table 1. Crystal data and structure refinement for complex **8**.

---

|                                   |                                                                                                               |
|-----------------------------------|---------------------------------------------------------------------------------------------------------------|
| Identification code               | wf090506                                                                                                      |
| Empirical formula                 | C <sub>60</sub> H <sub>47</sub> B <sub>3</sub> Cl <sub>2</sub> N <sub>2</sub> O <sub>7</sub>                  |
| Formula weight                    | 1011.33                                                                                                       |
| Temperature                       | 173(2) K                                                                                                      |
| Wavelength                        | 0.71073 Å                                                                                                     |
| Crystal system                    | Ortho.                                                                                                        |
| Space group                       | P2(1)2(1)2(1)                                                                                                 |
| Unit cell dimensions              | a = 12.865(3) Å<br>b = 17.944(4) Å<br>c = 21.546(4) Å<br>alpha = 90 deg.<br>beta = 90 deg.<br>gamma = 90 deg. |
| Volume                            | 4973.9(17) Å <sup>3</sup>                                                                                     |
| Z                                 | 4                                                                                                             |
| Density (calculated)              | 1.351 Mg/m <sup>3</sup>                                                                                       |
| Absorption coefficient            | 0.190 mm <sup>-1</sup>                                                                                        |
| F(000)                            | 2104                                                                                                          |
| Crystal size                      | 0.4 x 0.3 x 0.3 mm                                                                                            |
| Theta range for data collection   | 1.48 to 28.28 deg.                                                                                            |
| Index ranges                      | -16 ≤ h ≤ 17, -23 ≤ k ≤ 23, -28 ≤ l ≤ 28                                                                      |
| Reflections collected / unique    | 59972 / 12068 [R(int) = 0.0573]                                                                               |
| Completeness to theta = 28.28     | 99.1%                                                                                                         |
| Refinement method                 | Full-matrix least-squares on F <sup>2</sup>                                                                   |
| Data / restraints / parameters    | 12068 / 0 / 671                                                                                               |
| Goodness-of-fit on F <sup>2</sup> | 0.941                                                                                                         |
| Final R indices [I > 2σ(I)]       | R1 = 0.0497, wR2 = 0.1253                                                                                     |
| R indices (all data)              | R1 = 0.0859, wR2 = 0.1455                                                                                     |
| Absolute structure parameter      | -0.03(7)                                                                                                      |
| Largest diff. peak and hole       | 0.524 and -0.400 e.Å <sup>-3</sup>                                                                            |

Table 2. Atomic coordinates ( $\times 10^4$ ), equivalent isotropic displacement parameters ( $\text{\AA}^2 \times 10^3$ ), and occupancies for complex **8**.

| x     | y        | z        | U(eq)    | Occ.  |   |
|-------|----------|----------|----------|-------|---|
| C(00) | 5853(3)  | 6936(2)  | 9191(2)  | 55(1) | 1 |
| Cl(1) | 4750(1)  | 7200(1)  | 8776(1)  | 76(1) | 1 |
| Cl(2) | 6917(1)  | 7527(1)  | 9027(1)  | 66(1) | 1 |
| O(1)  | 2002(1)  | 1913(1)  | 10275(1) | 23(1) | 1 |
| C(2)  | 1747(2)  | 2548(1)  | 10592(1) | 22(1) | 1 |
| C(3)  | 1241(2)  | 3118(1)  | 10268(1) | 23(1) | 1 |
| C(4)  | 1094(2)  | 3013(1)  | 9582(1)  | 22(1) | 1 |
| C(5)  | 606(2)   | 2361(1)  | 9372(1)  | 22(1) | 1 |
| O(6)  | 281(1)   | 1861(1)  | 9814(1)  | 24(1) | 1 |
| B(7)  | 1135(2)  | 1423(2)  | 10107(1) | 24(1) | 1 |
| O(8)  | 662(1)   | 1077(1)  | 10671(1) | 25(1) | 1 |
| B(9)  | 705(2)   | 336(2)   | 10770(1) | 25(1) | 1 |
| O(10) | 1024(2)  | -164(1)  | 10320(1) | 30(1) | 1 |
| B(11) | 1387(2)  | 130(2)   | 9767(1)  | 27(1) | 1 |
| O(12) | 1533(1)  | 860(1)   | 9682(1)  | 26(1) | 1 |
| O(13) | 446(2)   | -7(1)    | 11322(1) | 32(1) | 1 |
| C(14) | 170(2)   | 350(1)   | 11868(1) | 27(1) | 1 |
| C(15) | -856(2)  | 331(2)   | 12050(1) | 38(1) | 1 |
| C(16) | -1135(3) | 634(2)   | 12624(2) | 47(1) | 1 |
| C(17) | -390(3)  | 945(2)   | 13003(1) | 42(1) | 1 |
| C(18) | 634(3)   | 965(2)   | 12812(1) | 38(1) | 1 |
| C(19) | 919(2)   | 671(2)   | 12244(1) | 32(1) | 1 |
| O(20) | 1621(2)  | -349(1)  | 9286(1)  | 39(1) | 1 |
| C(21) | 1342(2)  | -1093(1) | 9281(1)  | 30(1) | 1 |
| C(22) | 2115(3)  | -1628(2) | 9330(1)  | 35(1) | 1 |
| C(23) | 1844(3)  | -2379(2) | 9291(1)  | 38(1) | 1 |
| C(24) | 827(3)   | -2592(2) | 9201(1)  | 40(1) | 1 |



|       |          |          |          |       |   |
|-------|----------|----------|----------|-------|---|
| C(25) | 64(3)    | -2050(2) | 9149(2)  | 43(1) | 1 |
| C(26) | 317(3)   | -1297(2) | 9185(1)  | 38(1) | 1 |
| C(27) | 2014(2)  | 2613(1)  | 11238(1) | 23(1) | 1 |
| C(28) | 2627(2)  | 2074(1)  | 11594(1) | 24(1) | 1 |
| C(29) | 3116(2)  | 1441(1)  | 11339(1) | 28(1) | 1 |
| C(30) | 3725(2)  | 965(2)   | 11697(1) | 34(1) | 1 |
| C(31) | 3851(2)  | 1090(2)  | 12329(1) | 36(1) | 1 |
| C(32) | 3379(2)  | 1701(2)  | 12596(1) | 35(1) | 1 |
| C(33) | 2776(2)  | 2196(1)  | 12244(1) | 29(1) | 1 |
| C(34) | 2338(2)  | 2843(2)  | 12535(1) | 36(1) | 1 |
| C(35) | 1811(2)  | 3356(2)  | 12205(1) | 33(1) | 1 |
| C(36) | 1644(2)  | 3264(1)  | 11543(1) | 26(1) | 1 |
| C(37) | 1118(2)  | 3818(1)  | 11222(1) | 26(1) | 1 |
| C(38) | 922(2)   | 3774(1)  | 10589(1) | 24(1) | 1 |
| C(39) | 368(2)   | 4419(1)  | 10304(1) | 25(1) | 1 |
| C(40) | 715(2)   | 5144(1)  | 10432(1) | 30(1) | 1 |
| C(41) | 187(2)   | 5762(2)  | 10205(1) | 35(1) | 1 |
| C(42) | -690(2)  | 5668(2)  | 9841(1)  | 36(1) | 1 |
| C(43) | -1051(2) | 4956(2)  | 9719(1)  | 34(1) | 1 |
| C(44) | -524(2)  | 4332(2)  | 9942(1)  | 29(1) | 1 |
| C(45) | 1478(2)  | 3532(1)  | 9138(1)  | 23(1) | 1 |
| C(46) | 2031(2)  | 4241(1)  | 9294(1)  | 24(1) | 1 |
| C(47) | 1751(2)  | 4898(1)  | 8982(1)  | 30(1) | 1 |
| C(48) | 2285(2)  | 5554(2)  | 9080(1)  | 36(1) | 1 |
| C(49) | 3112(2)  | 5574(2)  | 9491(2)  | 38(1) | 1 |
| C(50) | 3399(2)  | 4930(2)  | 9803(1)  | 34(1) | 1 |
| C(51) | 2868(2)  | 4271(1)  | 9705(1)  | 28(1) | 1 |
| C(52) | 1388(2)  | 3369(1)  | 8515(1)  | 26(1) | 1 |
| C(53) | 904(2)   | 2721(1)  | 8299(1)  | 26(1) | 1 |
| C(54) | 893(2)   | 2570(2)  | 7642(1)  | 34(1) | 1 |
| C(55) | 481(2)   | 1949(2)  | 7416(1)  | 38(1) | 1 |
| C(56) | -27(2)   | 1423(2)  | 7815(1)  | 32(1) | 1 |
| C(57) | -502(2)  | 783(2)   | 7561(2)  | 41(1) | 1 |

|       |          |         |         |       |   |
|-------|----------|---------|---------|-------|---|
| C(58) | -1049(3) | 294(2)  | 7919(2) | 45(1) | 1 |
| C(59) | -1152(2) | 436(2)  | 8553(2) | 40(1) | 1 |
| C(60) | -678(2)  | 1047(2) | 8823(1) | 31(1) | 1 |
| C(61) | -75(2)   | 1552(1) | 8469(1) | 27(1) | 1 |
| C(62) | 455(2)   | 2204(1) | 8724(1) | 23(1) | 1 |
| C(71) | 3321(2)  | 1687(1) | 8193(1) | 30(1) | 1 |
| C(73) | 4426(2)  | 2761(2) | 8231(2) | 39(1) | 1 |
| C(72) | 3942(2)  | 2224(2) | 7890(1) | 36(1) | 1 |
| N(74) | 4303(2)  | 2812(1) | 8844(1) | 36(1) | 1 |
| C(75) | 3692(2)  | 2317(2) | 9150(1) | 34(1) | 1 |
| C(76) | 3206(2)  | 1761(1) | 8841(1) | 29(1) | 1 |
| N(77) | 2872(2)  | 1126(1) | 7877(1) | 34(1) | 1 |
| C(78) | 2356(3)  | 516(2)  | 8209(2) | 40(1) | 1 |
| C(79) | 2939(3)  | 1083(2) | 7201(1) | 47(1) | 1 |

---

U(eq) is defined as one third of the trace of the orthogonalized Uij tensor.

Table 3. Bond lengths [Å] and angles [deg] for complex **8**.

---

|             |          |
|-------------|----------|
| C(00)-Cl(1) | 1.744(4) |
| C(00)-Cl(2) | 1.766(4) |
| O(1)-C(2)   | 1.370(3) |
| O(1)-B(7)   | 1.466(3) |

|             |          |
|-------------|----------|
| C(2)-C(3)   | 1.400(3) |
| C(2)-C(27)  | 1.438(3) |
| C(3)-C(38)  | 1.425(3) |
| C(3)-C(4)   | 1.501(3) |
| C(4)-C(5)   | 1.404(3) |
| C(4)-C(45)  | 1.424(3) |
| C(5)-O(6)   | 1.372(3) |
| C(5)-C(62)  | 1.437(3) |
| O(6)-B(7)   | 1.492(3) |
| B(7)-O(12)  | 1.455(3) |
| B(7)-O(8)   | 1.493(3) |
| O(8)-B(9)   | 1.348(3) |
| B(9)-O(13)  | 1.379(3) |
| B(9)-O(10)  | 1.384(3) |
| O(10)-B(11) | 1.384(4) |
| B(11)-O(12) | 1.336(3) |
| B(11)-O(20) | 1.379(3) |
| O(13)-C(14) | 1.386(3) |
| C(14)-C(15) | 1.377(4) |
| C(14)-C(19) | 1.384(4) |
| C(15)-C(16) | 1.398(4) |
| C(16)-C(17) | 1.378(5) |
| C(17)-C(18) | 1.380(5) |
| C(18)-C(19) | 1.383(4) |
| O(20)-C(21) | 1.382(3) |
| C(21)-C(26) | 1.384(4) |
| C(21)-C(22) | 1.387(4) |
| C(22)-C(23) | 1.394(4) |
| C(23)-C(24) | 1.376(5) |
| C(24)-C(25) | 1.386(5) |
| C(25)-C(26) | 1.393(4) |
| C(27)-C(36) | 1.422(3) |
| C(27)-C(28) | 1.464(3) |

|             |          |
|-------------|----------|
| C(28)-C(29) | 1.409(4) |
| C(28)-C(33) | 1.431(4) |
| C(29)-C(30) | 1.392(4) |
| C(30)-C(31) | 1.389(4) |
| C(31)-C(32) | 1.380(4) |
| C(32)-C(33) | 1.403(4) |
| C(33)-C(34) | 1.435(4) |
| C(34)-C(35) | 1.346(4) |
| C(35)-C(36) | 1.451(4) |
| C(36)-C(37) | 1.387(4) |
| C(37)-C(38) | 1.389(4) |
| C(38)-C(39) | 1.492(3) |
| C(39)-C(44) | 1.396(4) |
| C(39)-C(40) | 1.403(4) |
| C(40)-C(41) | 1.389(4) |
| C(41)-C(42) | 1.384(4) |
| C(42)-C(43) | 1.385(4) |
| C(43)-C(44) | 1.395(4) |
| C(45)-C(52) | 1.377(4) |
| C(45)-C(46) | 1.498(3) |
| C(46)-C(51) | 1.395(4) |
| C(46)-C(47) | 1.405(3) |
| C(47)-C(48) | 1.379(4) |
| C(48)-C(49) | 1.386(4) |
| C(49)-C(50) | 1.386(4) |
| C(50)-C(51) | 1.382(4) |
| C(52)-C(53) | 1.398(4) |
| C(53)-C(62) | 1.427(4) |
| C(53)-C(54) | 1.440(4) |
| C(54)-C(55) | 1.327(4) |
| C(55)-C(56) | 1.435(4) |
| C(56)-C(57) | 1.412(4) |
| C(56)-C(61) | 1.430(4) |

|                   |            |
|-------------------|------------|
| C(57)-C(58)       | 1.364(5)   |
| C(58)-C(59)       | 1.396(5)   |
| C(59)-C(60)       | 1.383(4)   |
| C(60)-C(61)       | 1.415(4)   |
| C(61)-C(62)       | 1.463(3)   |
| C(71)-N(77)       | 1.346(4)   |
| C(71)-C(76)       | 1.411(4)   |
| C(71)-C(72)       | 1.412(4)   |
| C(73)-N(74)       | 1.333(4)   |
| C(73)-C(72)       | 1.362(4)   |
| N(74)-C(75)       | 1.357(4)   |
| C(75)-C(76)       | 1.352(4)   |
| N(77)-C(79)       | 1.461(4)   |
| N(77)-C(78)       | 1.465(4)   |
| Cl(1)-C(00)-Cl(2) | 111.37(19) |
| C(2)-O(1)-B(7)    | 116.13(19) |
| O(1)-C(2)-C(3)    | 118.1(2)   |
| O(1)-C(2)-C(27)   | 119.5(2)   |
| C(3)-C(2)-C(27)   | 122.4(2)   |
| C(2)-C(3)-C(38)   | 119.6(2)   |
| C(2)-C(3)-C(4)    | 117.3(2)   |
| C(38)-C(3)-C(4)   | 123.0(2)   |
| C(5)-C(4)-C(45)   | 118.9(2)   |
| C(5)-C(4)-C(3)    | 118.6(2)   |
| C(45)-C(4)-C(3)   | 122.4(2)   |
| O(6)-C(5)-C(4)    | 117.1(2)   |
| O(6)-C(5)-C(62)   | 120.4(2)   |
| C(4)-C(5)-C(62)   | 122.5(2)   |
| C(5)-O(6)-B(7)    | 114.49(19) |
| O(12)-B(7)-O(1)   | 107.7(2)   |
| O(12)-B(7)-O(6)   | 111.0(2)   |
| O(1)-B(7)-O(6)    | 110.39(19) |
| O(12)-B(7)-O(8)   | 111.5(2)   |

|                   |          |
|-------------------|----------|
| O(1)-B(7)-O(8)    | 111.0(2) |
| O(6)-B(7)-O(8)    | 105.3(2) |
| B(9)-O(8)-B(7)    | 121.5(2) |
| O(8)-B(9)-O(13)   | 124.6(2) |
| O(8)-B(9)-O(10)   | 122.6(2) |
| O(13)-B(9)-O(10)  | 112.7(2) |
| B(9)-O(10)-B(11)  | 117.2(2) |
| O(12)-B(11)-O(20) | 118.5(3) |
| O(12)-B(11)-O(10) | 122.6(2) |
| O(20)-B(11)-O(10) | 118.9(2) |
| B(11)-O(12)-B(7)  | 123.0(2) |
| B(9)-O(13)-C(14)  | 126.0(2) |
| C(15)-C(14)-C(19) | 120.8(3) |
| C(15)-C(14)-O(13) | 118.4(2) |
| C(19)-C(14)-O(13) | 120.7(3) |
| C(14)-C(15)-C(16) | 119.2(3) |
| C(17)-C(16)-C(15) | 120.3(3) |
| C(16)-C(17)-C(18) | 119.8(3) |
| C(17)-C(18)-C(19) | 120.5(3) |
| C(18)-C(19)-C(14) | 119.5(3) |
| B(11)-O(20)-C(21) | 123.5(2) |
| O(20)-C(21)-C(26) | 120.3(3) |
| O(20)-C(21)-C(22) | 118.8(3) |
| C(26)-C(21)-C(22) | 120.8(3) |
| C(21)-C(22)-C(23) | 119.0(3) |
| C(24)-C(23)-C(22) | 121.0(3) |
| C(23)-C(24)-C(25) | 119.3(3) |
| C(24)-C(25)-C(26) | 120.7(3) |
| C(21)-C(26)-C(25) | 119.2(3) |
| C(36)-C(27)-C(2)  | 115.7(2) |
| C(36)-C(27)-C(28) | 118.8(2) |
| C(29)-C(28)-C(33) | 116.4(2) |
| C(29)-C(28)-C(27) | 124.7(2) |

|                   |          |
|-------------------|----------|
| C(33)-C(28)-C(27) | 118.9(2) |
| C(30)-C(29)-C(28) | 122.0(2) |
| C(31)-C(30)-C(29) | 120.7(3) |
| C(32)-C(31)-C(30) | 119.0(3) |
| C(31)-C(32)-C(33) | 121.4(3) |
| C(32)-C(33)-C(28) | 120.4(3) |
| C(32)-C(33)-C(34) | 119.6(2) |
| C(28)-C(33)-C(34) | 120.0(2) |
| C(35)-C(34)-C(33) | 121.3(2) |
| C(34)-C(35)-C(36) | 121.1(3) |
| C(37)-C(36)-C(27) | 121.4(2) |
| C(37)-C(36)-C(35) | 118.8(2) |
| C(27)-C(36)-C(35) | 119.8(2) |
| C(36)-C(37)-C(38) | 122.6(2) |
| C(37)-C(38)-C(3)  | 118.1(2) |
| C(37)-C(38)-C(39) | 116.6(2) |
| C(3)-C(38)-C(39)  | 125.3(2) |
| C(44)-C(39)-C(40) | 118.4(2) |
| C(44)-C(39)-C(38) | 122.4(2) |
| C(40)-C(39)-C(38) | 119.1(2) |
| C(41)-C(40)-C(39) | 121.0(3) |
| C(42)-C(41)-C(40) | 120.1(3) |
| C(43)-C(42)-C(41) | 119.6(3) |
| C(42)-C(43)-C(44) | 120.8(3) |
| C(43)-C(44)-C(39) | 120.1(2) |
| C(52)-C(45)-C(4)  | 119.2(2) |
| C(52)-C(45)-C(46) | 116.1(2) |
| C(4)-C(45)-C(46)  | 124.7(2) |
| C(51)-C(46)-C(47) | 118.1(2) |
| C(51)-C(46)-C(45) | 122.8(2) |
| C(47)-C(46)-C(45) | 118.9(2) |
| C(48)-C(47)-C(46) | 121.0(3) |
| C(47)-C(48)-C(49) | 120.1(3) |

|                   |          |
|-------------------|----------|
| C(48)-C(49)-C(50) | 119.5(3) |
| C(51)-C(50)-C(49) | 120.6(3) |
| C(50)-C(51)-C(46) | 120.7(2) |
| C(45)-C(52)-C(53) | 122.6(2) |
| C(52)-C(53)-C(62) | 120.4(2) |
| C(52)-C(53)-C(54) | 119.3(2) |
| C(62)-C(53)-C(54) | 120.3(2) |
| C(55)-C(54)-C(53) | 121.6(3) |
| C(54)-C(55)-C(56) | 121.0(3) |
| C(57)-C(56)-C(61) | 119.7(3) |
| C(57)-C(56)-C(55) | 120.1(3) |
| C(61)-C(56)-C(55) | 120.3(2) |
| C(58)-C(57)-C(56) | 121.8(3) |
| C(57)-C(58)-C(59) | 119.0(3) |
| C(60)-C(59)-C(58) | 120.9(3) |
| C(59)-C(60)-C(61) | 121.5(3) |
| C(60)-C(61)-C(56) | 116.9(2) |
| C(60)-C(61)-C(62) | 124.4(2) |
| C(56)-C(61)-C(62) | 118.7(2) |
| C(53)-C(62)-C(5)  | 116.3(2) |
| C(53)-C(62)-C(61) | 117.9(2) |
| C(5)-C(62)-C(61)  | 125.8(2) |
| N(77)-C(71)-C(76) | 121.8(2) |
| N(77)-C(71)-C(72) | 121.4(3) |
| C(76)-C(71)-C(72) | 116.8(3) |
| N(74)-C(73)-C(72) | 122.0(3) |
| C(73)-C(72)-C(71) | 119.5(3) |
| C(73)-N(74)-C(75) | 120.3(3) |
| C(76)-C(75)-N(74) | 120.8(3) |
| C(75)-C(76)-C(71) | 120.6(3) |
| C(71)-N(77)-C(79) | 121.2(2) |
| C(71)-N(77)-C(78) | 120.4(2) |
| C(79)-N(77)-C(78) | 118.3(2) |



---

Symmetry transformations used to generate equivalent atoms:

Table 4. Anisotropic displacement parameters ( $\text{Å}^2 \times 10^3$ ) for complex **8**.

---

| U11   | U22   | U33   | U23   | U13   | U12   |       |
|-------|-------|-------|-------|-------|-------|-------|
| C(00) | 81(3) | 51(2) | 34(2) | 8(2)  | 1(2)  | 2(2)  |
| Cl(1) | 66(1) | 79(1) | 82(1) | 35(1) | -4(1) | -6(1) |
| Cl(2) | 67(1) | 74(1) | 57(1) | -6(1) | 0(1)  | -2(1) |
| O(1)  | 29(1) | 17(1) | 23(1) | -1(1) | 0(1)  | 0(1)  |
| C(2)  | 26(1) | 17(1) | 22(1) | -1(1) | 1(1)  | -4(1) |
| C(3)  | 27(1) | 19(1) | 22(1) | -1(1) | 0(1)  | -2(1) |
| C(4)  | 24(1) | 19(1) | 23(1) | -1(1) | -1(1) | 2(1)  |
| C(5)  | 24(1) | 19(1) | 23(1) | 1(1)  | -2(1) | 3(1)  |
| O(6)  | 31(1) | 20(1) | 21(1) | 1(1)  | 2(1)  | -3(1) |
| B(7)  | 31(2) | 18(1) | 23(1) | 2(1)  | 2(1)  | 0(1)  |

---

|       |       |       |       |       |       |        |
|-------|-------|-------|-------|-------|-------|--------|
| O(8)  | 33(1) | 20(1) | 22(1) | 0(1)  | 4(1)  | 0(1)   |
| B(9)  | 27(1) | 20(1) | 27(2) | 1(1)  | 2(1)  | -2(1)  |
| O(10) | 41(1) | 18(1) | 31(1) | 1(1)  | 7(1)  | 0(1)   |
| B(11) | 32(2) | 21(1) | 29(2) | -3(1) | 1(1)  | -2(1)  |
| O(12) | 36(1) | 20(1) | 23(1) | -2(1) | 6(1)  | 0(1)   |
| O(13) | 52(1) | 21(1) | 25(1) | 2(1)  | 4(1)  | 1(1)   |
| C(14) | 38(2) | 22(1) | 22(1) | 4(1)  | 3(1)  | 0(1)   |
| C(15) | 36(2) | 40(2) | 38(2) | -3(1) | -3(1) | -9(1)  |
| C(16) | 43(2) | 50(2) | 47(2) | -3(2) | 17(2) | -7(2)  |
| C(17) | 62(2) | 36(2) | 29(2) | -2(1) | 10(2) | -2(2)  |
| C(18) | 49(2) | 34(2) | 31(2) | -3(1) | -9(1) | -2(1)  |
| C(19) | 33(1) | 30(1) | 32(2) | 5(1)  | 1(1)  | 2(1)   |
| O(20) | 62(1) | 20(1) | 34(1) | -5(1) | 18(1) | -3(1)  |
| C(21) | 49(2) | 19(1) | 23(1) | -6(1) | 8(1)  | -1(1)  |
| C(22) | 48(2) | 29(1) | 30(2) | -4(1) | 1(1)  | 0(1)   |
| C(23) | 56(2) | 27(1) | 31(2) | -2(1) | -2(1) | 7(1)   |
| C(24) | 62(2) | 23(1) | 35(2) | -4(1) | 6(2)  | -6(1)  |
| C(25) | 43(2) | 40(2) | 46(2) | -7(1) | 5(1)  | -11(1) |
| C(26) | 44(2) | 33(2) | 38(2) | -6(1) | 6(1)  | 7(1)   |
| C(27) | 25(1) | 21(1) | 23(1) | 0(1)  | -1(1) | -6(1)  |
| C(28) | 27(1) | 23(1) | 23(1) | 5(1)  | -1(1) | -6(1)  |
| C(29) | 29(1) | 31(1) | 24(1) | 3(1)  | -1(1) | 0(1)   |
| C(30) | 32(2) | 32(1) | 37(2) | 4(1)  | 2(1)  | 4(1)   |
| C(31) | 30(1) | 40(2) | 37(2) | 12(1) | -6(1) | 1(1)   |
| C(32) | 39(2) | 37(2) | 28(1) | 6(1)  | -8(1) | -6(1)  |
| C(33) | 31(1) | 27(1) | 29(1) | 4(1)  | -3(1) | -5(1)  |
| C(34) | 51(2) | 35(2) | 21(1) | -3(1) | -5(1) | -2(1)  |
| C(35) | 48(2) | 26(1) | 26(1) | -5(1) | -2(1) | 2(1)   |
| C(36) | 32(1) | 24(1) | 21(1) | 0(1)  | -3(1) | -4(1)  |
| C(37) | 35(1) | 19(1) | 24(1) | -4(1) | 1(1)  | -3(1)  |
| C(38) | 26(1) | 21(1) | 23(1) | 0(1)  | 0(1)  | -4(1)  |
| C(39) | 32(1) | 22(1) | 22(1) | 0(1)  | 5(1)  | 1(1)   |
| C(40) | 40(2) | 24(1) | 27(1) | -3(1) | 1(1)  | -1(1)  |

|       |       |       |       |        |        |        |
|-------|-------|-------|-------|--------|--------|--------|
| C(41) | 51(2) | 20(1) | 34(2) | -2(1)  | 6(1)   | 4(1)   |
| C(42) | 44(2) | 28(1) | 37(2) | 5(1)   | 3(1)   | 12(1)  |
| C(43) | 31(1) | 36(2) | 34(2) | 4(1)   | -3(1)  | 1(1)   |
| C(44) | 34(1) | 24(1) | 29(1) | 1(1)   | -3(1)  | 0(1)   |
| C(45) | 24(1) | 22(1) | 24(1) | 1(1)   | -2(1)  | 2(1)   |
| C(46) | 28(1) | 18(1) | 25(1) | 1(1)   | 3(1)   | 2(1)   |
| C(47) | 36(2) | 25(1) | 31(2) | 2(1)   | 2(1)   | 5(1)   |
| C(48) | 45(2) | 20(1) | 44(2) | 6(1)   | 10(1)  | 2(1)   |
| C(49) | 41(2) | 25(1) | 49(2) | -3(1)  | 11(1)  | -6(1)  |
| C(50) | 30(1) | 32(1) | 40(2) | -6(1)  | 1(1)   | -2(1)  |
| C(51) | 31(1) | 22(1) | 30(1) | 1(1)   | 1(1)   | -1(1)  |
| C(52) | 32(1) | 24(1) | 24(1) | 5(1)   | 0(1)   | 1(1)   |
| C(53) | 32(1) | 26(1) | 19(1) | -1(1)  | -2(1)  | 8(1)   |
| C(54) | 46(2) | 35(2) | 23(1) | 5(1)   | -1(1)  | 3(1)   |
| C(55) | 50(2) | 43(2) | 20(1) | -7(1)  | -9(1)  | 6(1)   |
| C(56) | 33(1) | 31(1) | 31(1) | -7(1)  | -7(1)  | 6(1)   |
| C(57) | 42(2) | 40(2) | 39(2) | -17(1) | -10(1) | 2(1)   |
| C(58) | 42(2) | 38(2) | 56(2) | -24(2) | -13(2) | -4(1)  |
| C(59) | 32(2) | 34(2) | 52(2) | -8(1)  | -3(1)  | -3(1)  |
| C(60) | 30(1) | 28(1) | 35(2) | -6(1)  | -1(1)  | 1(1)   |
| C(61) | 26(1) | 25(1) | 31(1) | -6(1)  | -5(1)  | 5(1)   |
| C(62) | 26(1) | 21(1) | 22(1) | -1(1)  | -1(1)  | 5(1)   |
| C(71) | 31(1) | 26(1) | 32(1) | 0(1)   | -1(1)  | 2(1)   |
| C(73) | 40(2) | 28(1) | 48(2) | 8(1)   | 5(1)   | -6(1)  |
| C(72) | 43(2) | 33(1) | 30(2) | 4(1)   | 5(1)   | -3(1)  |
| N(74) | 38(1) | 30(1) | 41(1) | 1(1)   | -7(1)  | -1(1)  |
| C(75) | 38(2) | 33(1) | 31(2) | 0(1)   | -3(1)  | 6(1)   |
| C(76) | 31(1) | 26(1) | 31(1) | 5(1)   | 2(1)   | -2(1)  |
| N(77) | 44(1) | 29(1) | 29(1) | -1(1)  | 3(1)   | -4(1)  |
| C(78) | 47(2) | 29(2) | 44(2) | -5(1)  | 9(1)   | -10(1) |
| C(79) | 69(2) | 42(2) | 31(2) | -9(1)  | 4(2)   | 1(2)   |

---

The anisotropic displacement factor exponent takes the form:

$$-2 \pi^2 [ h^2 a^2 U_{11} + \dots + 2 h k a^* b^* U_{12} ]$$

Table 5. Hydrogen coordinates (  $\times 10^4$ ), isotropic displacement parameters ( $\text{\AA}^2 \times 10^3$ ), and occupancies for complex **8**.

| x      | y     | z     | U(eq) | Occ. |   |
|--------|-------|-------|-------|------|---|
| H(00A) | 6035  | 6427  | 9085  | 66   | 1 |
| H(00B) | 5703  | 6953  | 9632  | 66   | 1 |
| H(15A) | -1357 | 118   | 11794 | 46   | 1 |
| H(16A) | -1826 | 625   | 12750 | 56   | 1 |
| H(17A) | -577  | 1142  | 13387 | 51   | 1 |
| H(18A) | 1135  | 1177  | 13068 | 46   | 1 |
| H(19A) | 1608  | 689   | 12115 | 38   | 1 |
| H(22A) | 2804  | -1488 | 9387  | 42   | 1 |
| H(23A) | 2357  | -2741 | 9327  | 46   | 1 |
| H(24A) | 654   | -3094 | 9175  | 48   | 1 |
| H(25A) | -624  | -2191 | 9090  | 51   | 1 |
| H(26A) | -196  | -935  | 9145  | 46   | 1 |
| H(29A) | 3030  | 1339  | 10919 | 34   | 1 |

|        |          |          |          |        |   |
|--------|----------|----------|----------|--------|---|
| H(30A) | 4050     | 560      | 11511    | 40     | 1 |
| H(31A) | 4248     | 766      | 12568    | 43     | 1 |
| H(32A) | 3464     | 1787     | 13019    | 42     | 1 |
| H(34A) | 2420     | 2910     | 12961    | 43     | 1 |
| H(35A) | 1550     | 3776     | 12404    | 40     | 1 |
| H(37A) | 887      | 4234     | 11438    | 31     | 1 |
| H(40A) | 1307     | 5212     | 10674    | 36     | 1 |
| H(41A) | 424      | 6239     | 10297    | 42     | 1 |
| H(42A) | -1034    | 6080     | 9680     | 44     | 1 |
| H(43A) | -1652    | 4893     | 9485     | 41     | 1 |
| H(44A) | -767     | 3856     | 9849     | 35     | 1 |
| H(47A) | 1196     | 4891     | 8705     | 36     | 1 |
| H(48A) | 2089     | 5985     | 8869     | 43     | 1 |
| H(49A) | 3473     | 6016     | 9558     | 46     | 1 |
| H(50A) | 3953     | 4942     | 10079    | 41     | 1 |
| H(51A) | 3070     | 3843     | 9917     | 33     | 1 |
| H(52A) | 1660     | 3703     | 8228     | 32     | 1 |
| H(54A) | 1182     | 2916     | 7371     | 41     | 1 |
| H(55A) | 523      | 1854     | 6992     | 45     | 1 |
| H(57A) | -440     | 692      | 7137     | 49     | 1 |
| H(58A) | -1348    | -128     | 7743     | 54     | 1 |
| H(59A) | -1546    | 115      | 8797     | 47     | 1 |
| H(60A) | -757     | 1128     | 9246     | 37     | 1 |
| H(73A) | 4855     | 3102     | 8031     | 46     | 1 |
| H(72A) | 4021     | 2212     | 7461     | 43     | 1 |
| H(74)  | 4750(30) | 3220(20) | 9110(20) | 84(13) | 1 |
| H(75A) | 3607     | 2360     | 9577     | 41     | 1 |
| H(76A) | 2793     | 1425     | 9058     | 35     | 1 |
| H(78A) | 2370     | 615      | 8646     | 60     | 1 |
| H(78B) | 2712     | 57       | 8125     | 60     | 1 |
| H(78C) | 1648     | 478      | 8071     | 60     | 1 |
| H(79A) | 3289     | 1517     | 7046     | 71     | 1 |
| H(79B) | 2252     | 1059     | 7029     | 71     | 1 |

Table 6. Hydrogen-bonds [A and deg.] for complex **8**.

| D-H...A      | d(D-H) | d(H...A) | d(D...A) | <(DHA) |
|--------------|--------|----------|----------|--------|
| N74-H74...O8 | 1.091  | 1.787    | 2.850    | 163.58 |
| N74-H74...O6 | 1.091  | 2.426    | 3.207    | 127.35 |

## 7. Preparation of the VAPOL Boroxinate Imine Complex **10** by using stoichiometric $B(OPh)_3$ and its reaction with ethyl diazoacetate (EDA).

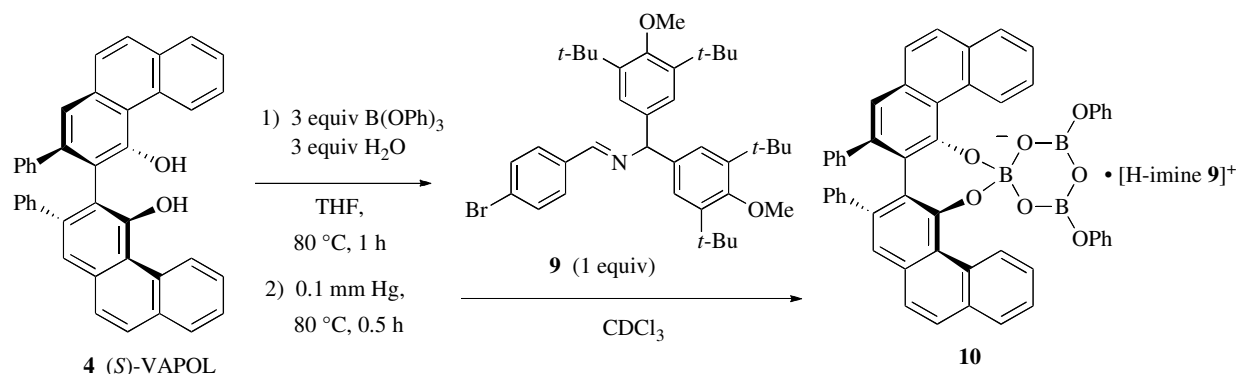

A flame dried 25 mL pear-shaped flask that had its 14/20 joint replaced by a high vacuum threaded T-shaped Teflon valve and which contained a stir bar was cooled under argon to room temperature and charged with (*S*)-VAPOL (54 mg, 0.1 mmol), commercial  $B(OPh)_3$  (87 mg, 0.3 mmol), and 4 mL THF. To this solution was added deionized water (5.4  $\mu\text{L}$ , 0.3 mmol). The flask was sealed and heated to  $80\text{ }^\circ\text{C}$  for 1 h. The volatile materials were removed via high vacuum at  $80\text{ }^\circ\text{C}$  for 0.5 h yielding a mixture of VAPOL **4**, mesoborate **5** and pyroborate **6** in a ratio of 0.9:0.09:1.0. After cooling, the flask containing the mixture of **4**, **5** and **6** was moved into a glove box. To the mixture of **4**, **5** and **6** was added imine **9**<sup>3</sup> (64 mg, 0.1 mmol) followed by

~0.75 mL of  $\text{CDCl}_3$ . A red solution formed immediately. The  $^1\text{H}$  NMR spectrum of the solution indicated the clean formation of **10** containing 4% VAPOL **4**, <1% of **5**, and 6% of **6**. The  $^1\text{H}$  and  $^{11}\text{B}$  NMR spectra are given below and are labeled as VAPOL\_B3\_Imine\_9.

It should be noted that the ratio of **10**, VAPOL, **5** and **6** may vary significantly depending on the nature and amount of hydrolyzed boron species present in commercial  $\text{B}(\text{OPh})_3$ . Depending on the particular batch of  $\text{B}(\text{OPh})_3$ , it may be necessary to adjust the amount of  $\text{B}(\text{OPh})_3$  or the amount of water or the amount of the imine to maximize the percentage of **10** present in the mixture. As an example, see Section 8 below.

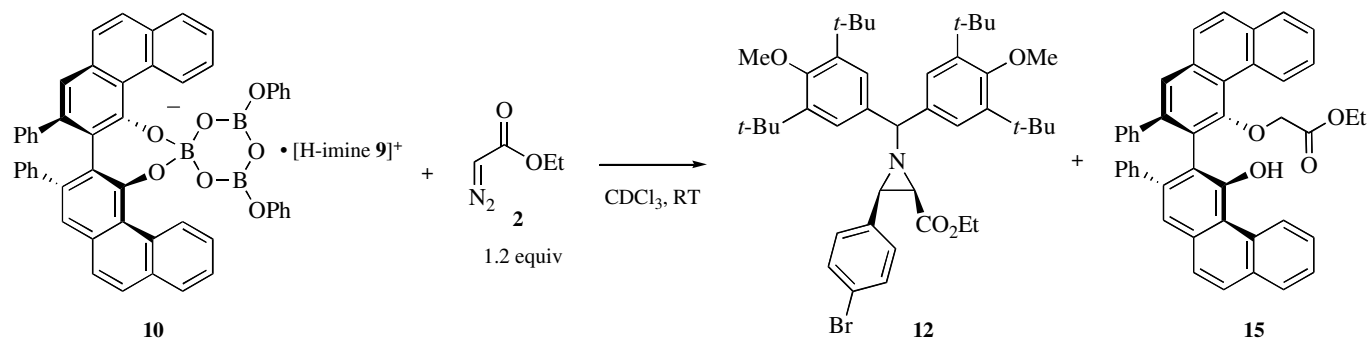

Following the NMR study on the solution of complex **10** prepared as described above, the solution was transferred to a Schlenk tube in a glove box. Ethyl diazoacetate (13  $\mu\text{L}$ , 1.5 equiv) was added. A reaction occurred instantly upon shaking at room temperature as indicated by intense discharge of a gas and the fading of the color of the solution. The aziridination was completed in a few minutes as judged by the cessation of the bubbling (loss of  $\text{N}_2$ ) and the initial red color completely disappearing to leave a colorless solution. The volatiles were removed under vacuum at room temperature and the residue was dissolved in  $\text{CDCl}_3$ . The  $^1\text{H}$  NMR spectrum revealed a complete conversion of the imine **9** and a clean production of the aziridine **12** with the aid of a  $^1\text{H}$  NMR spectrum of an authentic sample of **12**.<sup>3</sup> No significant amounts of enamine side-products were observed. As indicated by NMR analysis of the crude reaction

mixture, the characteristic peaks for the boroxinate core (10.35 ppm in the  $^1\text{H}$  NMR spectrum and 5.7 ppm in the  $^{11}\text{B}$  NMR spectrum) are nearly gone. The peaks in the bay proton region suggest that the bulk of the VAPOL ligand was alkylated by EDA to give the ester **15** while only small amounts of free VAPOL **4** and pyroborate **6** are present as evidenced by their bay regions doublets. The ratio of **12** to **15** is 3.0:2.6. The observation of the alkylated VAPOL derivative **15** has been previously documented at the end of the AZ reaction.<sup>2</sup> The  $^1\text{H}$  and  $^{11}\text{B}$  NMR spectrum of the crude reaction mixture of the reaction of **10** with ethyl diazoacetate are presented below and labeled with Solution of **10**+EDA.



13.66  
13.63

# VAPOL-B3-Imine-9 <sup>1</sup>H NMR

10.35  
10.34

9.78  
9.76

9.21  
9.20

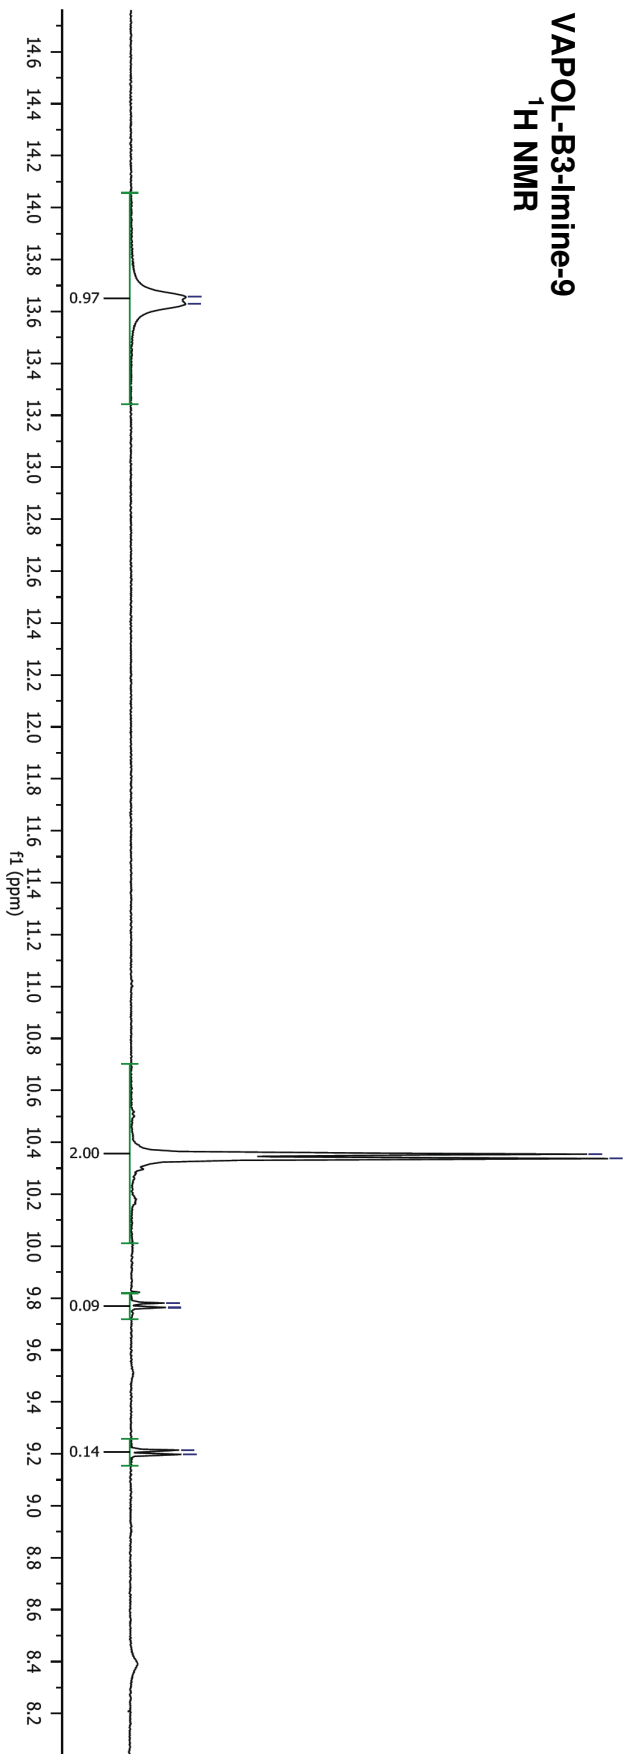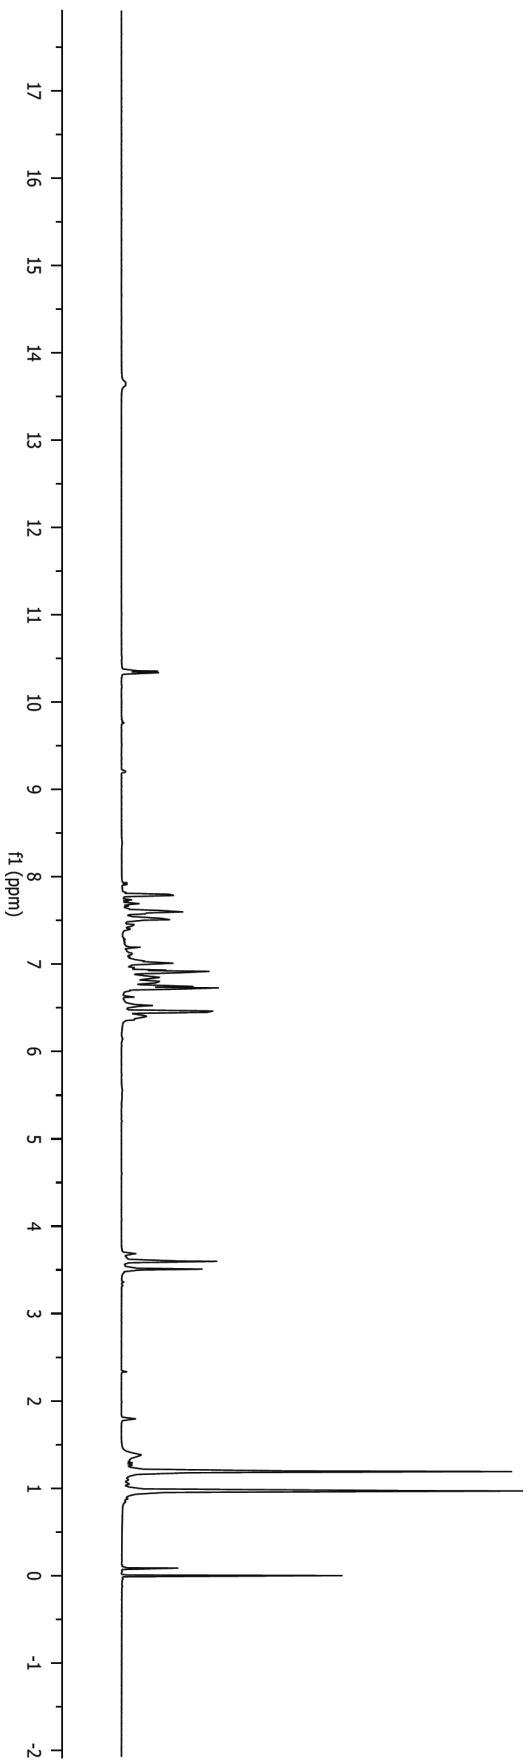

VAPOL-B3-Imine-9  
<sup>11</sup>B NMR

— 18.24

— 5.71

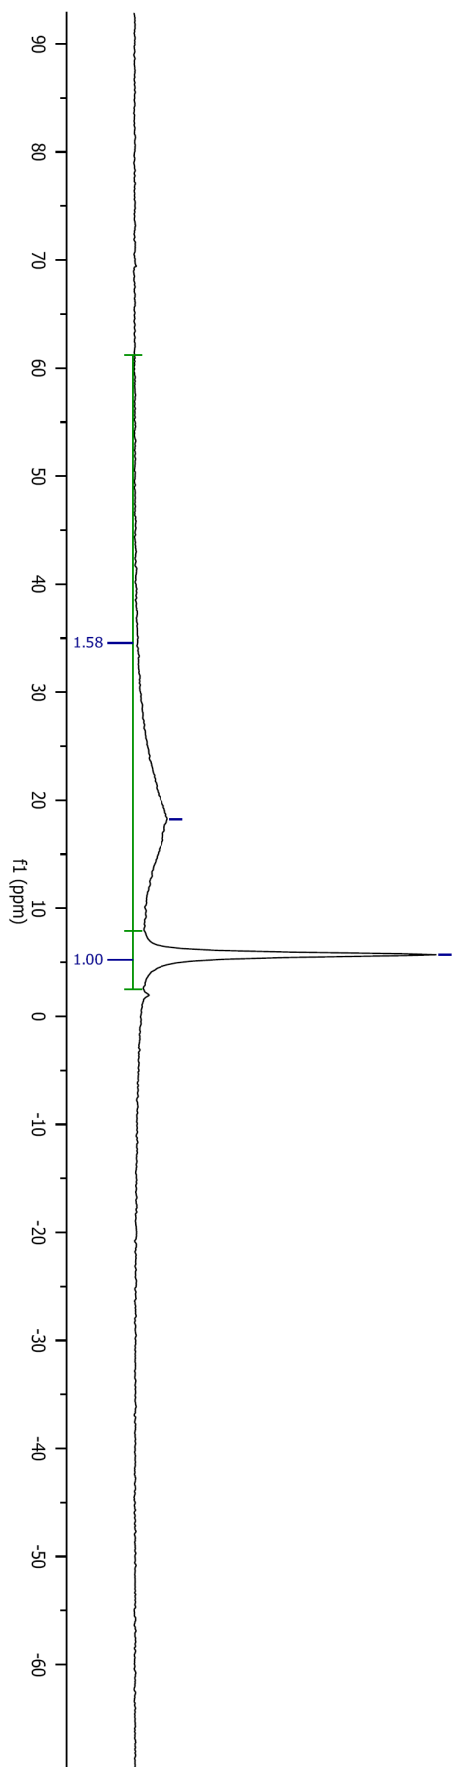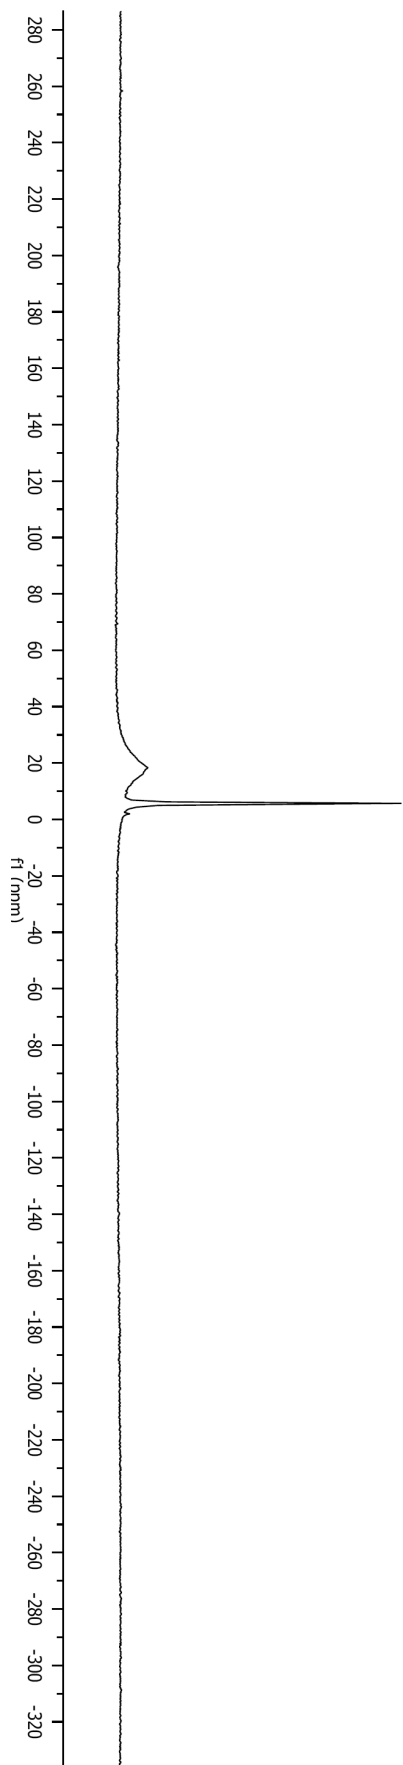

### Solution of 10 + EDA <sup>1</sup>H NMR

3.96  
3.95  
3.92  
3.91

3.82  
3.66  
3.60

3.11  
3.10

2.67  
2.65

1.40  
1.33

1.03  
1.02  
1.01

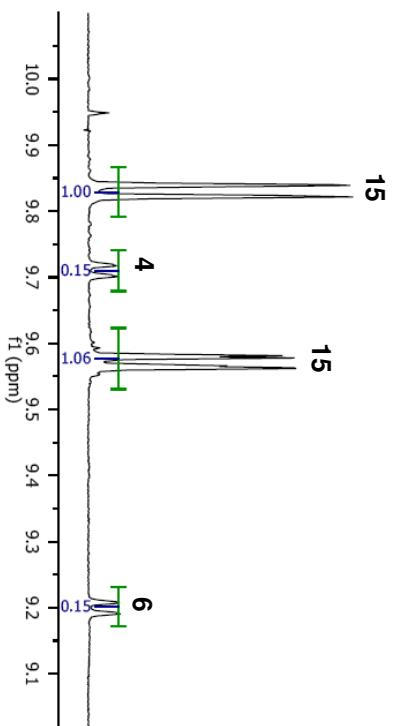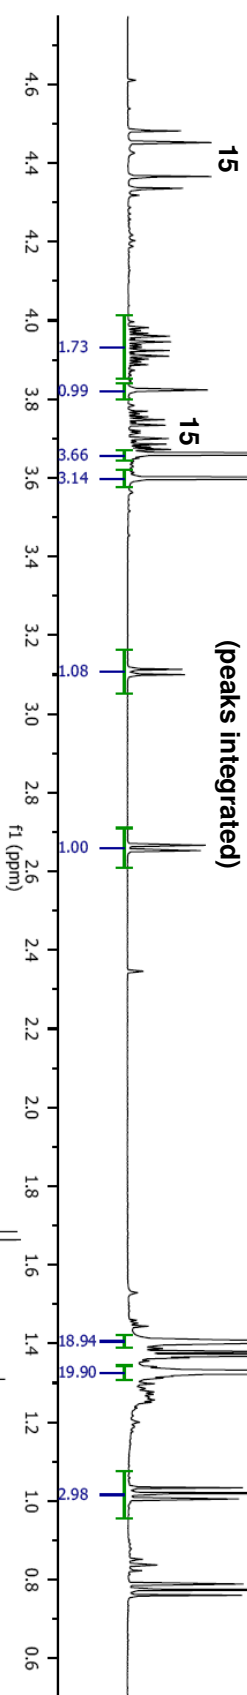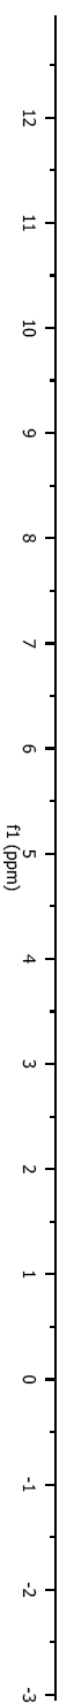

— 18.41  
— 5.46  
— 1.67

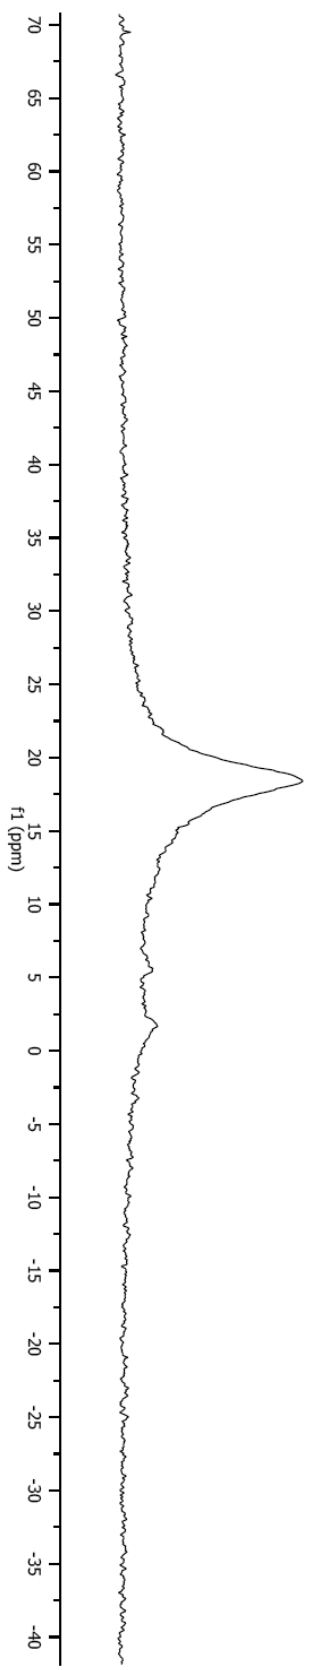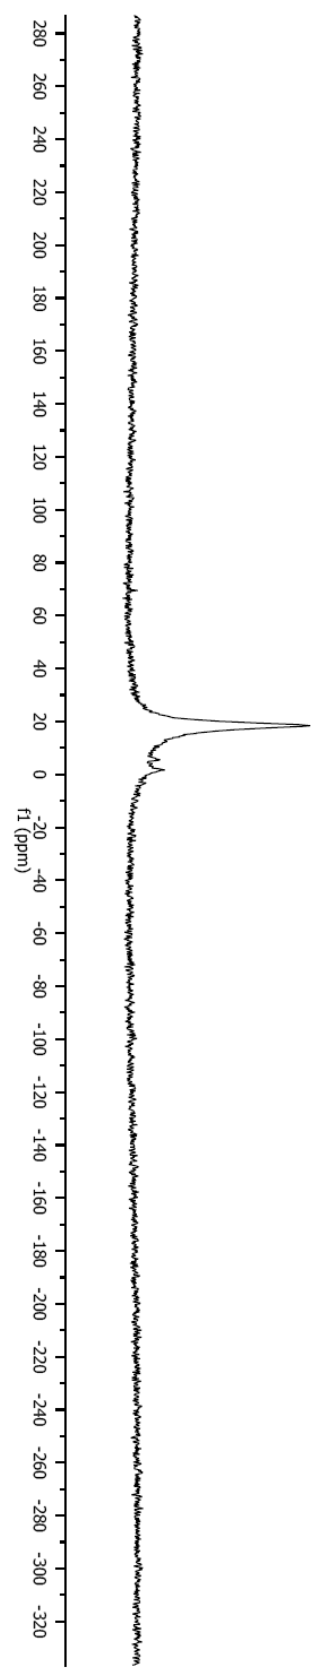

## 8. Preparation of the VAPOL Boroxinate Imine Complex **10** and its use as a Catalyst in the AZ Reaction.

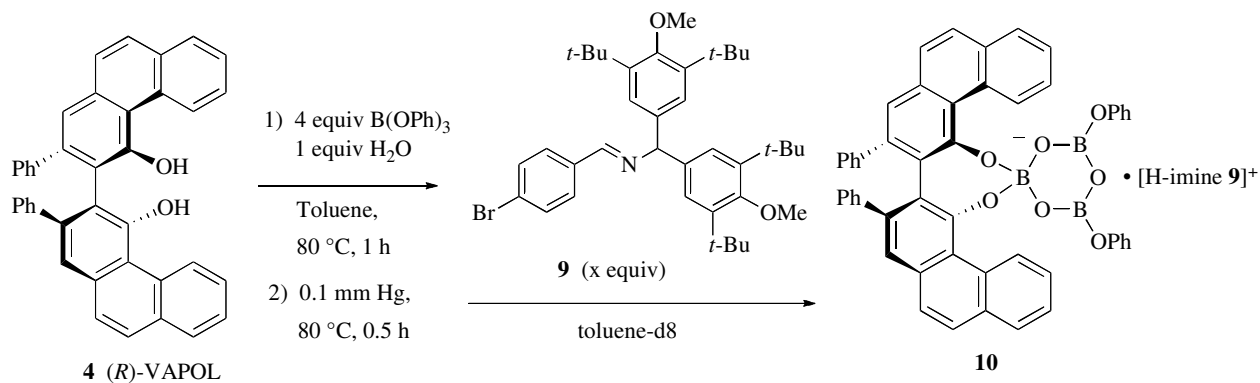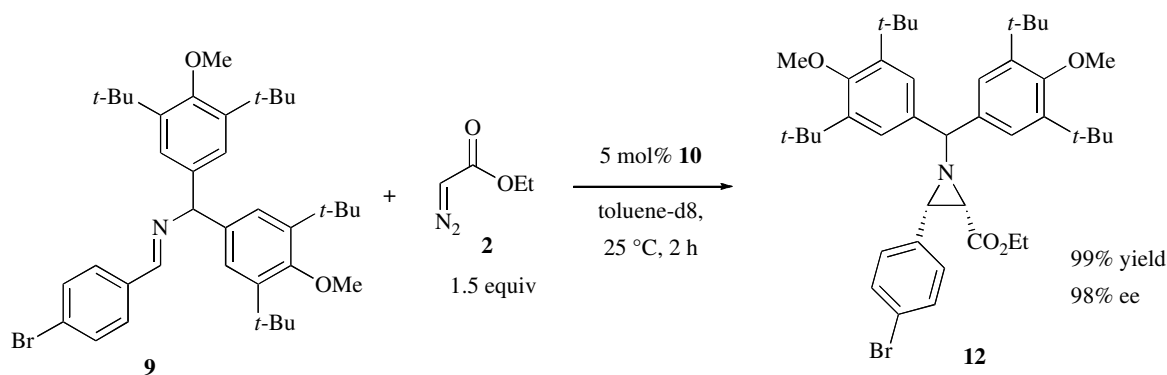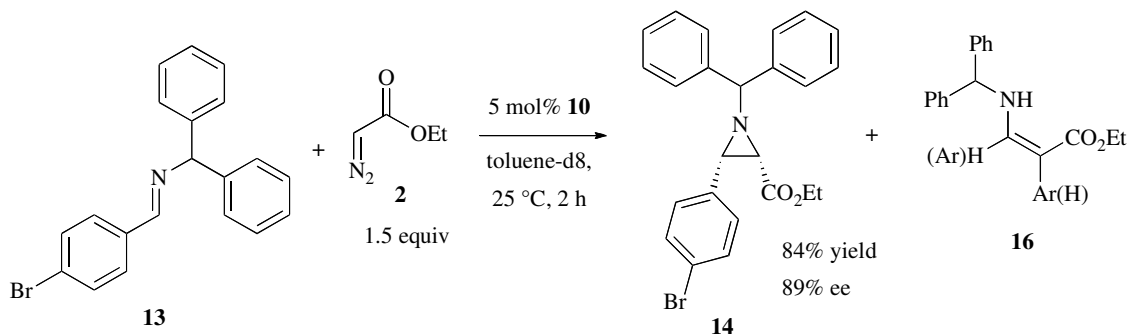

A flame dried 25 mL pear-shaped flask that had its 14/20 joint replaced by a high vacuum threaded T-shaped Teflon valve and which contained a stir bar was cooled under argon to room temperature and charged with (*R*)-VAPOL (54 mg, 0.1 mmol), commercial  $\text{B(OPh)}_3$  (116 mg, 0.4 mmol), and 2 mL THF. To this solution was added deionized water (1.8 mg, 0.1 mmol). The flask was sealed and heated to 80 °C for 1 h. The volatile materials were removed via high vacuum (0.1 mm Hg) at 80 °C for 0.5 h. After cooling to room temperature, imine **9** (64 mg, 0.1

mmol) and toluene d8 (2 mL) were added to the flask under argon. The solution was split into two equal parts of 1 mL each.

The first 1 mL of the solution was transferred by syringe to an NMR tube under argon. The  $^1\text{H}$  NMR spectrum revealed a mixture of **10**, VAPOL and pyroborate **6** in a ratio of 2.00:0.19:0.50. A few minutes later, a second equivalent of the solid imine **9** (32 mg, 0.05 mmol) was added to the NMR tube by removing the cap and quickly adding the imine and then replacing the cap and shaking the tube. This gave a 2.00:<0.02:0.33 ratio of **10**, VAPOL and pyroborate **6**. Finally, after a few minutes, a third equivalent of imine **9** (32 mg, 0.05 mmol) was added to the NMR tube in the same manner to give a 2.00:<0.02:0.10 ratio of **10**, VAPOL and pyroborate **6**. This solution of **10** in the NMR tube was poured under an argon stream into a flame dried 25 mL pear-shaped flask that had its 14/20 joint replaced by a high vacuum threaded T-shaped Teflon valve and which contained a stir bar was cooled under argon to room temperature. To the flask was also added 1 mL of toluene d8 to rinse the NMR tube. The flask was then added imine **9** (544 mg, 0.85 mmol) followed by ethyl diazoacetate (155  $\mu\text{L}$ , 1.5 mmol). Vigorous bubbling was observed upon addition of ethyl diazoacetate. The red color of the solution of **10** faded within 5 minutes. The mixture was stirred at room temperature for 2 h. After evaporation of the solvent, the residue was loaded onto a 30 mm diameter chromatography column packed to a depth of 300 mm with silica gel and eluted with a 19:1 mixture of hexane and ethyl acetate to give 715 mg (0.993 mmol, 99.3%) of the aziridine **12** as a white solid. The optical purity of **12** was determined to be 99% ee by HPLC analysis (Pirkle covalent (*R,R*) Whelk-O1 column, 225nm, 99:1 hexane/2-PrOH, flow-rate: 1 mL/min). Retention times:  $R_t = 5.43$  min for (*2S,3S*)-**12** and  $R_t = 9.15$  min for (*2R,3R*)-**12**. The cis/trans selectivity was >50:1. Spectral data for (*2S,3S*)-**12**:  $R_f = 0.32$  (20:1 hexane/EtOAc);  $^1\text{H}$  NMR ( $\text{CDCl}_3$ , 300 MHz)  $\delta$  1.02 (t, 3H,  $J = 6.9$  Hz), 1.33 (s, 18H), 1.41 (s, 18H), 2.67 (d, 1H,  $J = 6.6$  Hz), 3.12 (d, 1H,  $J = 6.6$  Hz), 3.61 (s, 3H), 3.67 (s, 3H), 3.84 (s, 1H), 3.91-3.97 (m, 2H), 7.30 (s, 2H), 7.37 (s,

4H), 7.41 (s, 2H);  $^{13}\text{C}$  NMR ( $\text{CDCl}_3$ , 75 MHz)  $\delta$  13.99, 32.03, 32.11, 35.69, 35.77, 46.33, 48.04, 60.61, 63.93, 63.98, 77.15, 121.21, 125.29, 125.38, 129.88, 130.68, 134.44, 136.40, 136.62, 143.11, 143.14, 158.29, 158.33, 167.88. The spectral data for **12** match those previously reported for this compound and the  $^1\text{H}$  and  $^{13}\text{C}$  NMR spectra are shown below.<sup>3</sup> The 99% yield and 98% ee is to be compared with the 98% yield and 99% ee reported for this compound from the AZ reaction.<sup>3</sup> The  $^1\text{H}$  and  $^{11}\text{B}$  NMR spectra of **10** prepared from 1, 2 and 3 equivalents of imine **9** are shown below and are labeled HL2-B3-BUDAMimine-xequiv. The stoichiometric reaction of **10** was also examined with ethyl diazoacetate. If a solution of **10** was generated as described above with 1 equivalent of imine **9** and reacted with 1.2 equivalents of ethyl diazoacetate for 24 h at 24 °C, the aziridine **12** could be isolated from the reaction in 100% yield in 99% ee.

To the flask containing the second 1 mL portion of the solution of **10** was added imine **9** (64 mg, 0.1 mmol) and toluene- $d_8$  (1 mL). The addition was accomplished by removing the threaded Teflon stopcock while there was a flow of argon into the side-T of the Teflon valve. The additional imine **9** was added to make a solution of **10** identical to that of the first portion. Then imine **13** (350 mg, 1.0 mmol) and ethyl diazoacetate (155  $\mu\text{L}$ , 1.5 mmol) were added. Vigorous bubbling was observed and the initial red color of the solution faded within 30 minutes. The mixture was stirred at room temperature for 2 hours. After evaporation of the solvent, the residue was loaded onto a 35 mm diameter chromatography column packed to a depth of 350 mm with silica gel and eluted with a 19:1 mixture of hexane and ethyl acetate to give 365 mg (0.84 mmol, 84%) of the aziridine **14** as a white solid. The optical purity of **14** was determined to be 89% ee by HPLC (Chiralcel OD-H column, 98:2 hexanes/2-propanol, 222 nm, flow rate 1 mL/min); Retention times:  $R_t = 5.37$  min (major enantiomer) and  $R_t = 13.48$  min (minor enantiomer). Spectral data for (2*S*,3*S*)-**14**;  $R_f = 0.33$  (1:9 ethyl acetate/hexanes).  $^1\text{H}$  NMR ( $\text{CDCl}_3$ , 500 MHz)  $\delta$  1.07 (t,  $J = 7$  Hz, 3H), 2.74 (d,  $J = 7$  Hz, 1H), 3.19 (d,  $J = 7$  Hz, 1H), 4.00 (q,

$J = 7$  Hz, 2H), 4.01 (s, 1H), 7.23 (t,  $J = 7$  Hz, 1H), 7.29-7.45 (m, 9H), 7.50 (d,  $J = 7$  Hz, 2H), 7.65 (d,  $J = 7$  Hz, 2H);  $^{13}\text{C}$  NMR ( $\text{CDCl}_3$ , 125 MHz)  $\delta$  13.96, 46.44, 47.31, 60.67, 77.55, 121.31, 127.11, 127.25, 127.40, 127.46, 128.49, 129.52, 130.86, 134.06, 142.12, 142.29, 167.37. These spectral data match those previously reported for this compound and the  $^1\text{H}$  and  $^{13}\text{C}$  NMR spectra are shown below.<sup>2</sup> The 84% yield and 89% ee is to be compared with the 78% yield and 90% ee reported for this compound from the AZ reaction.<sup>2</sup> The aziridine **12** was also isolated from this reaction but it was not pure since it co-eluted with the enamine side-products **16**. These side products are not formed in the reaction of imine **9**.



HL2-B3-BUDANMime-1equ1w07182009

Pulse Sequence: s2pml

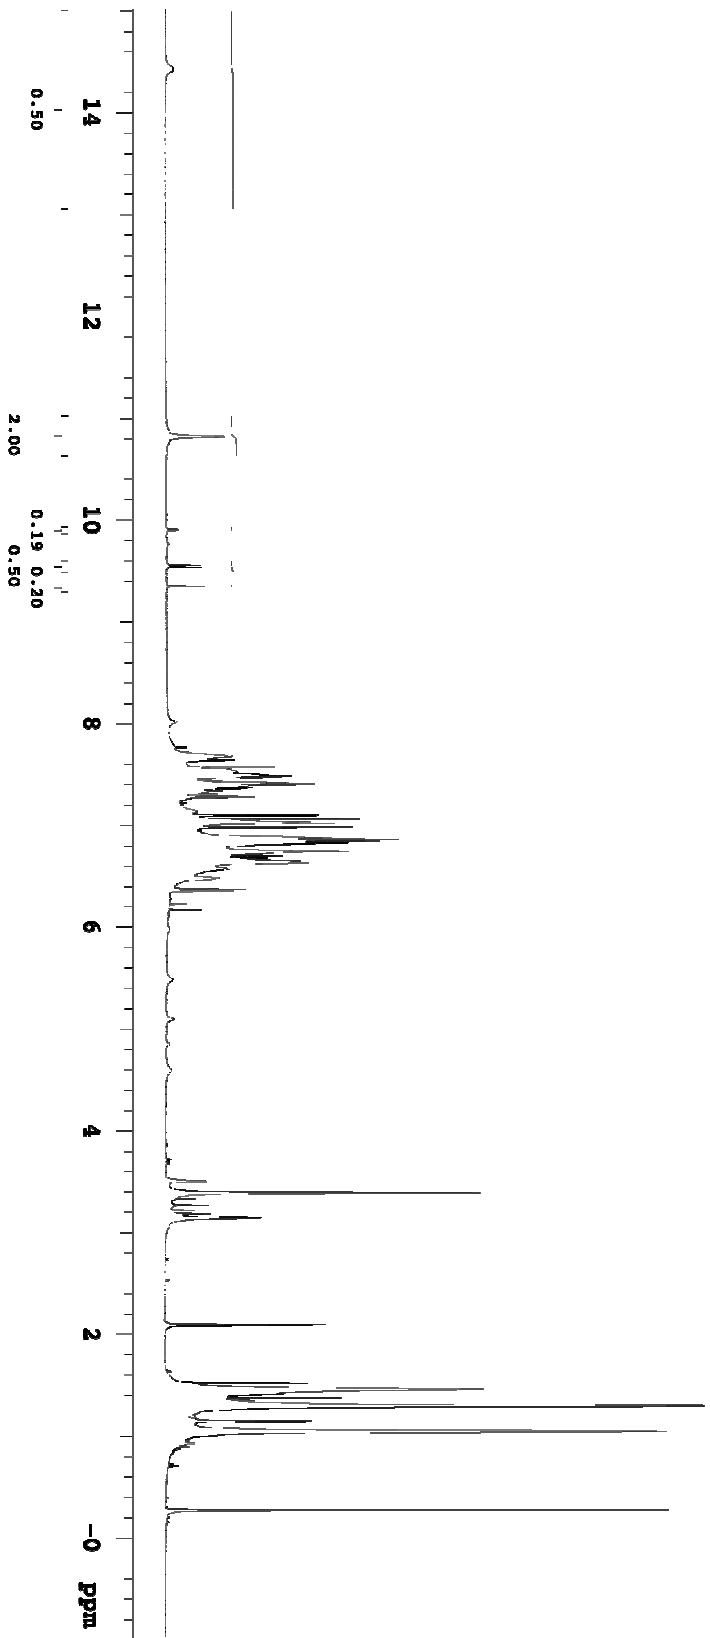

HL2-33-BDDAWJline-1eqv1707182009  
Pulse Sequence: s2pu1

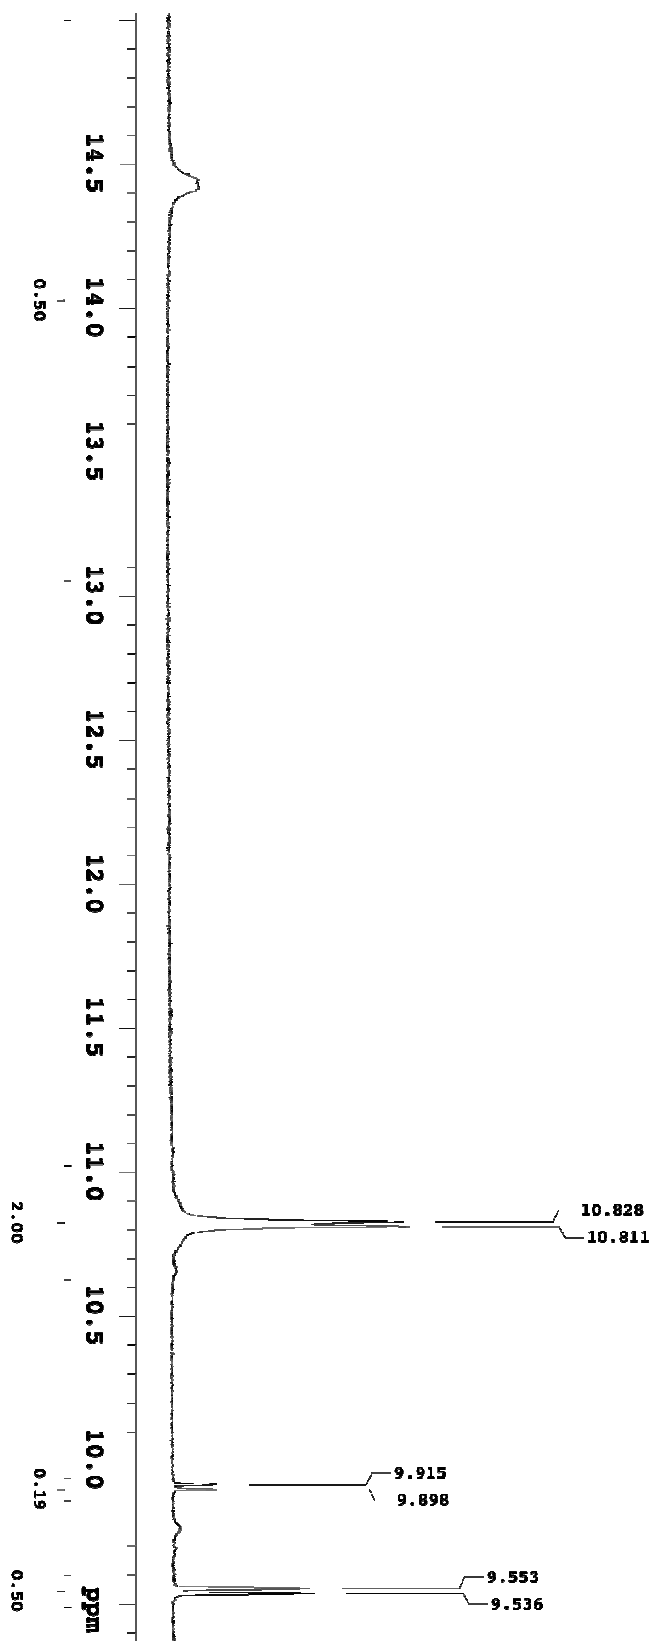

HL2-B3-BINDAMINE-2equ1v-07182009

Pulse Sequence: s2pnl

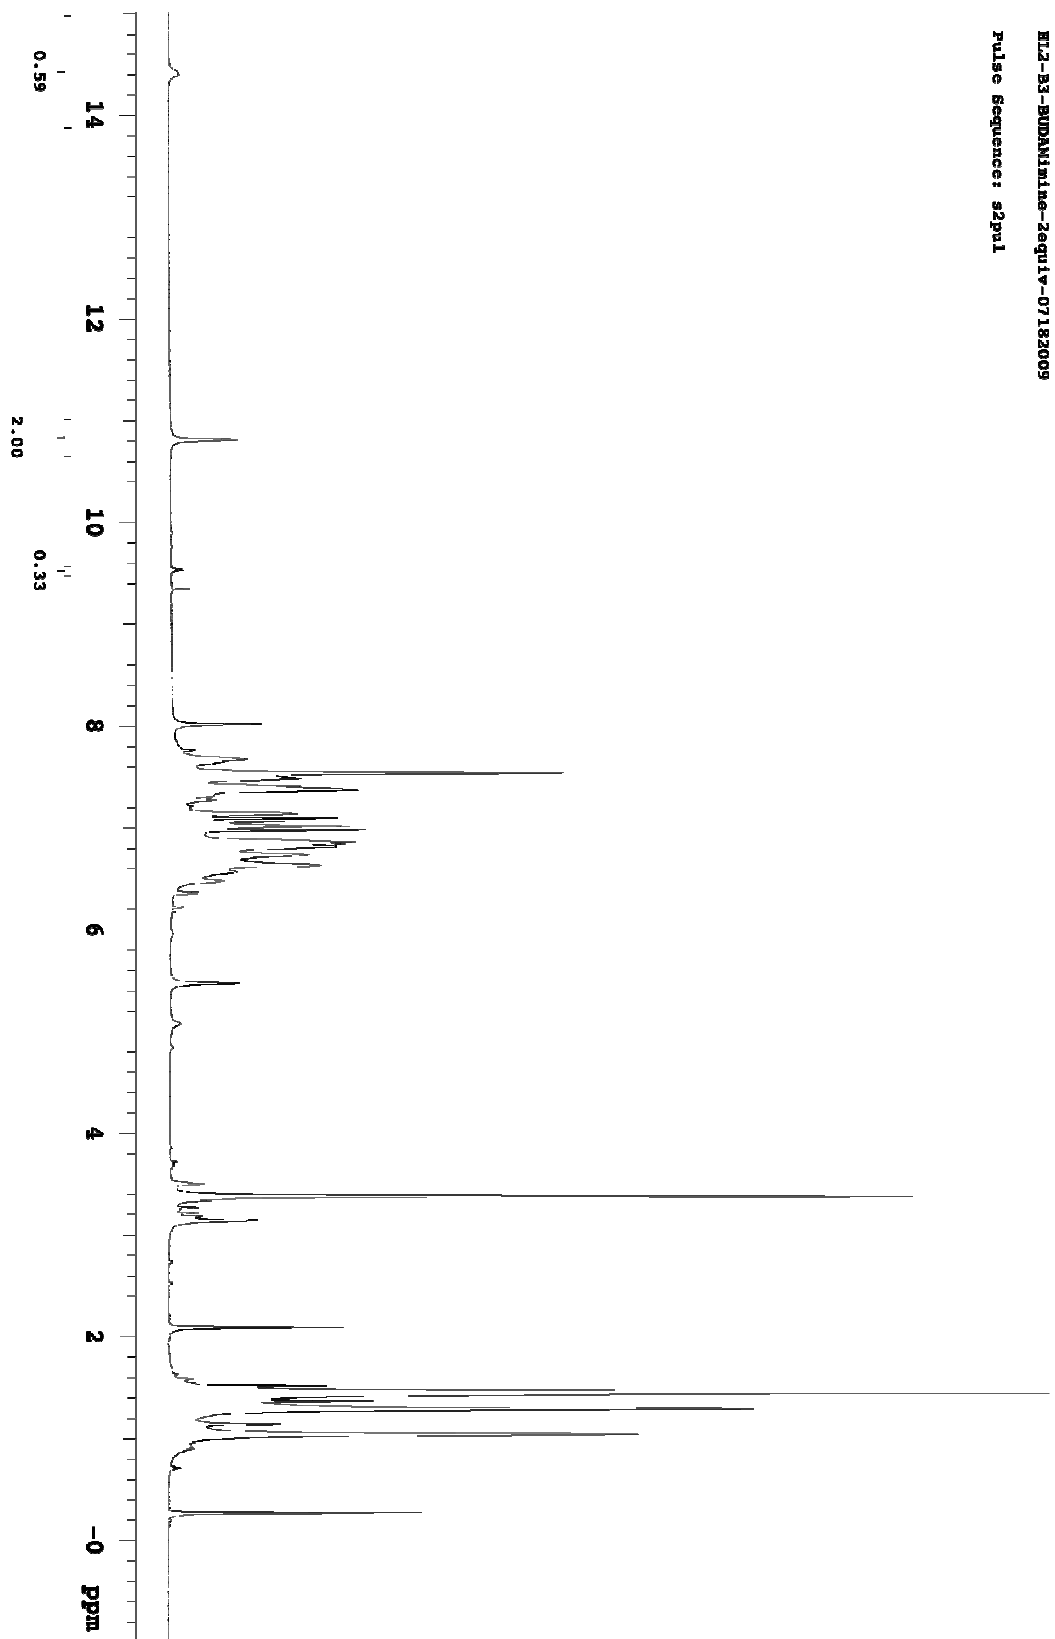

HL2-B3-BINDAMINE-2equ1v-07182009

Pulse Sequence: s2pnl

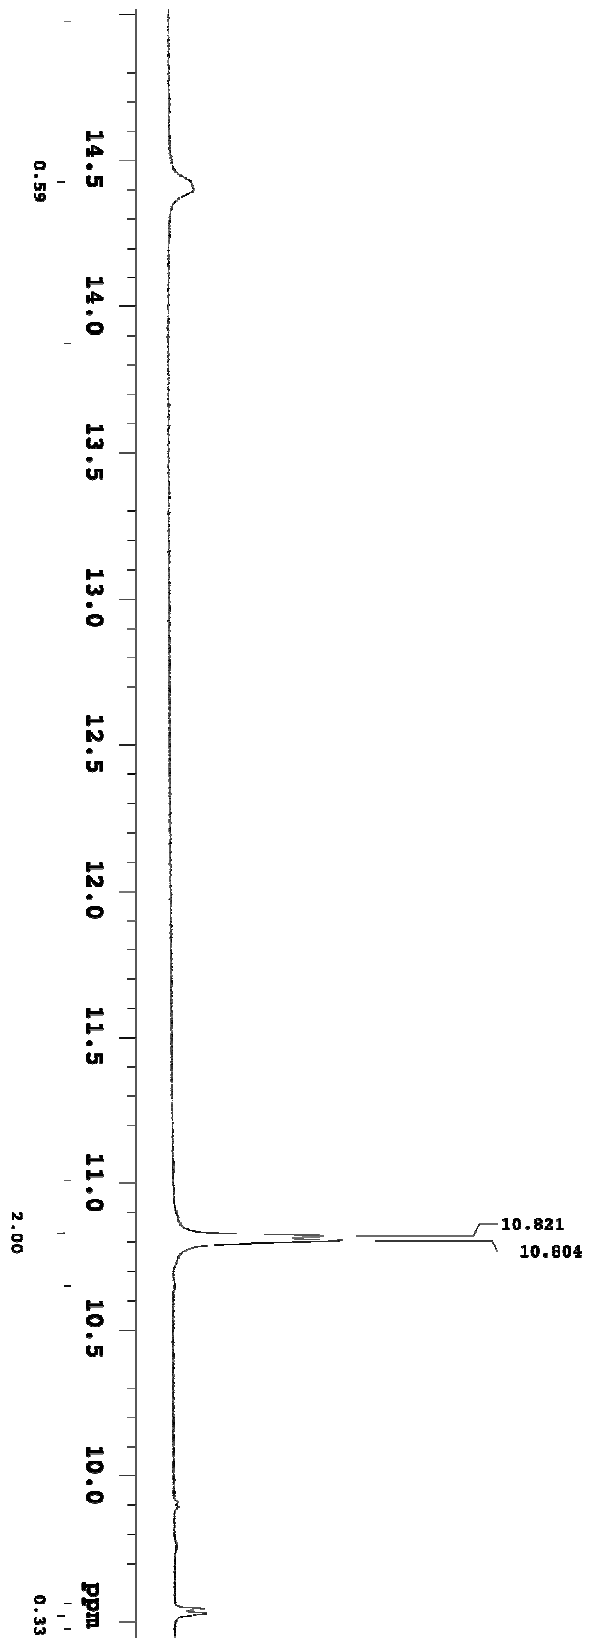

HL2-B3-BUDANILINE-3eugly-07182009

Pulse Sequence: s2pml

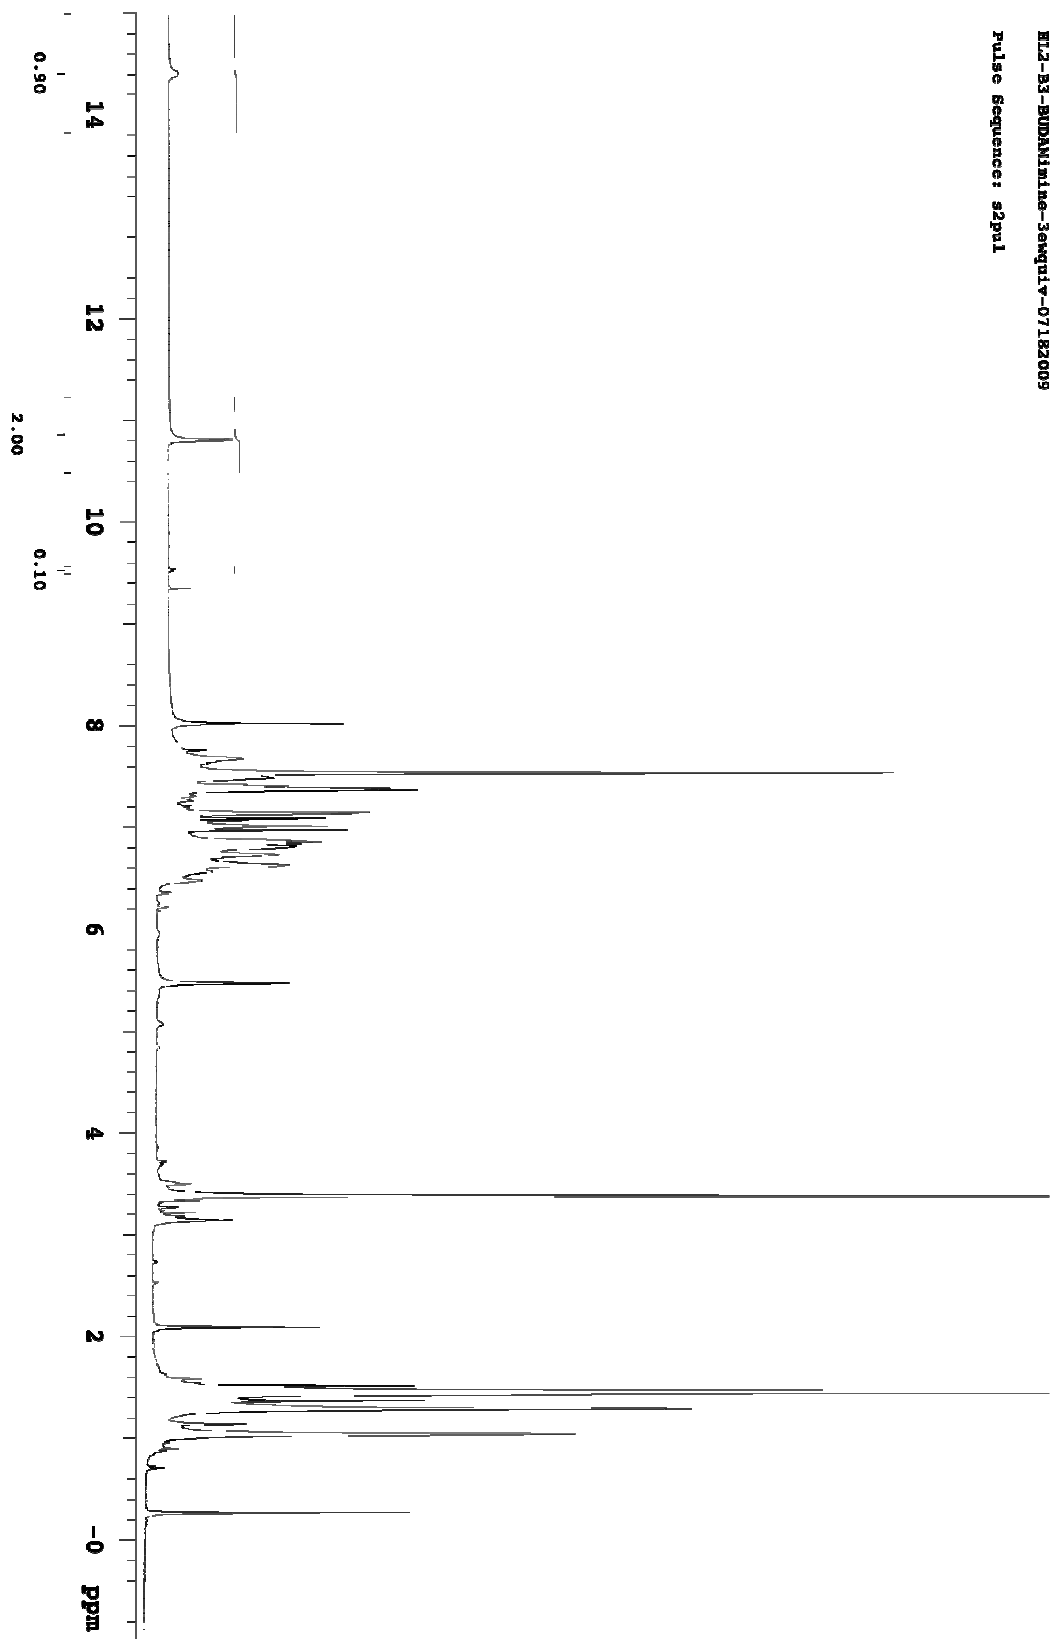

HL2-B3-BUDAMIMINE-3equliv-07182009

Pulse Sequence: s2pm1

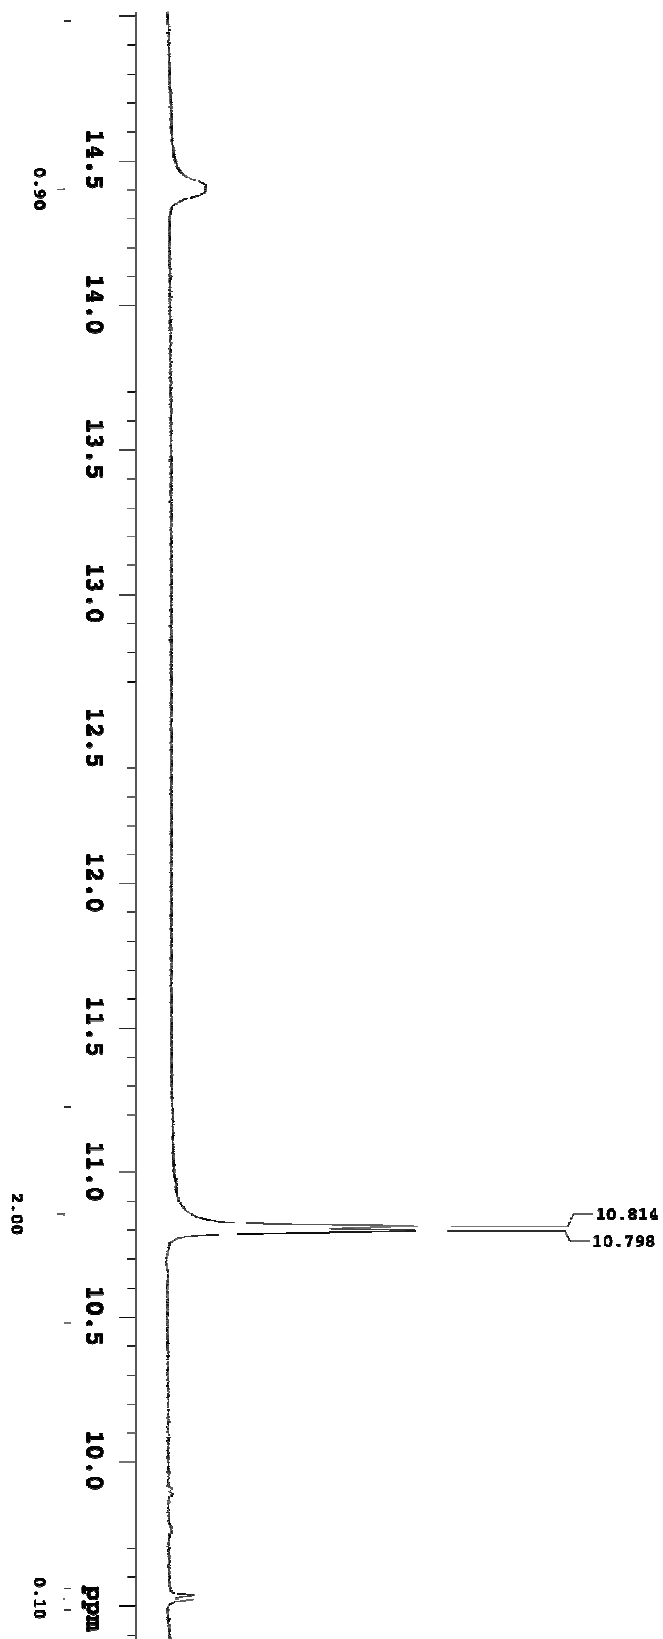

HL2-B3-BUDAMIMINE-3equiv-133

Archive directory: /home/gacs/vmrays/data  
Sample directory:

Pulse sequence: szpm1

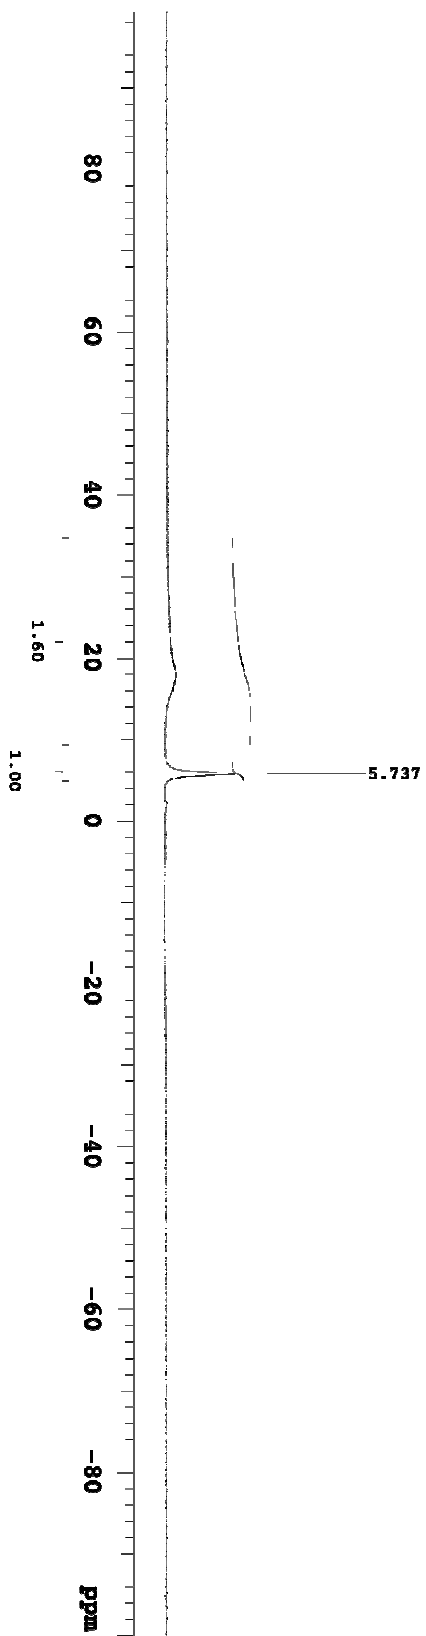

HL2-B3-BUDAMIMINE-3equiv-133

Archive directory: /home/gads/vmrays/data

Sample directory:

Pulse sequence: szpm1

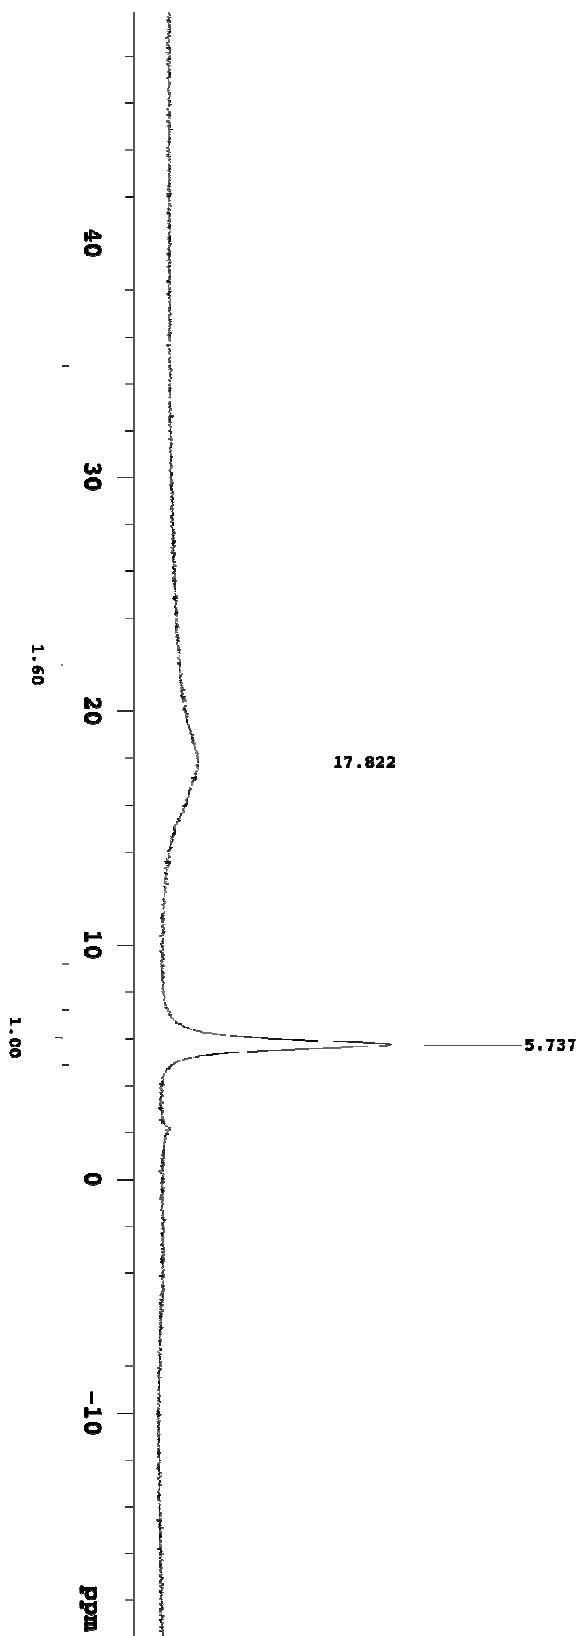



07182009-SUNAMAR1

Archive directory: /export/home/rsd/vmr1/vmrays/data

Sample directory:

Pulse sequence: szpm1

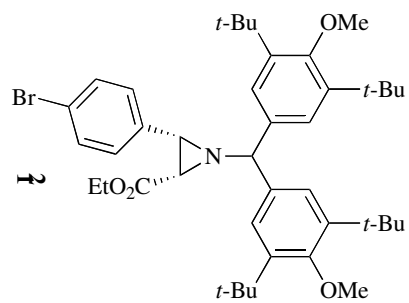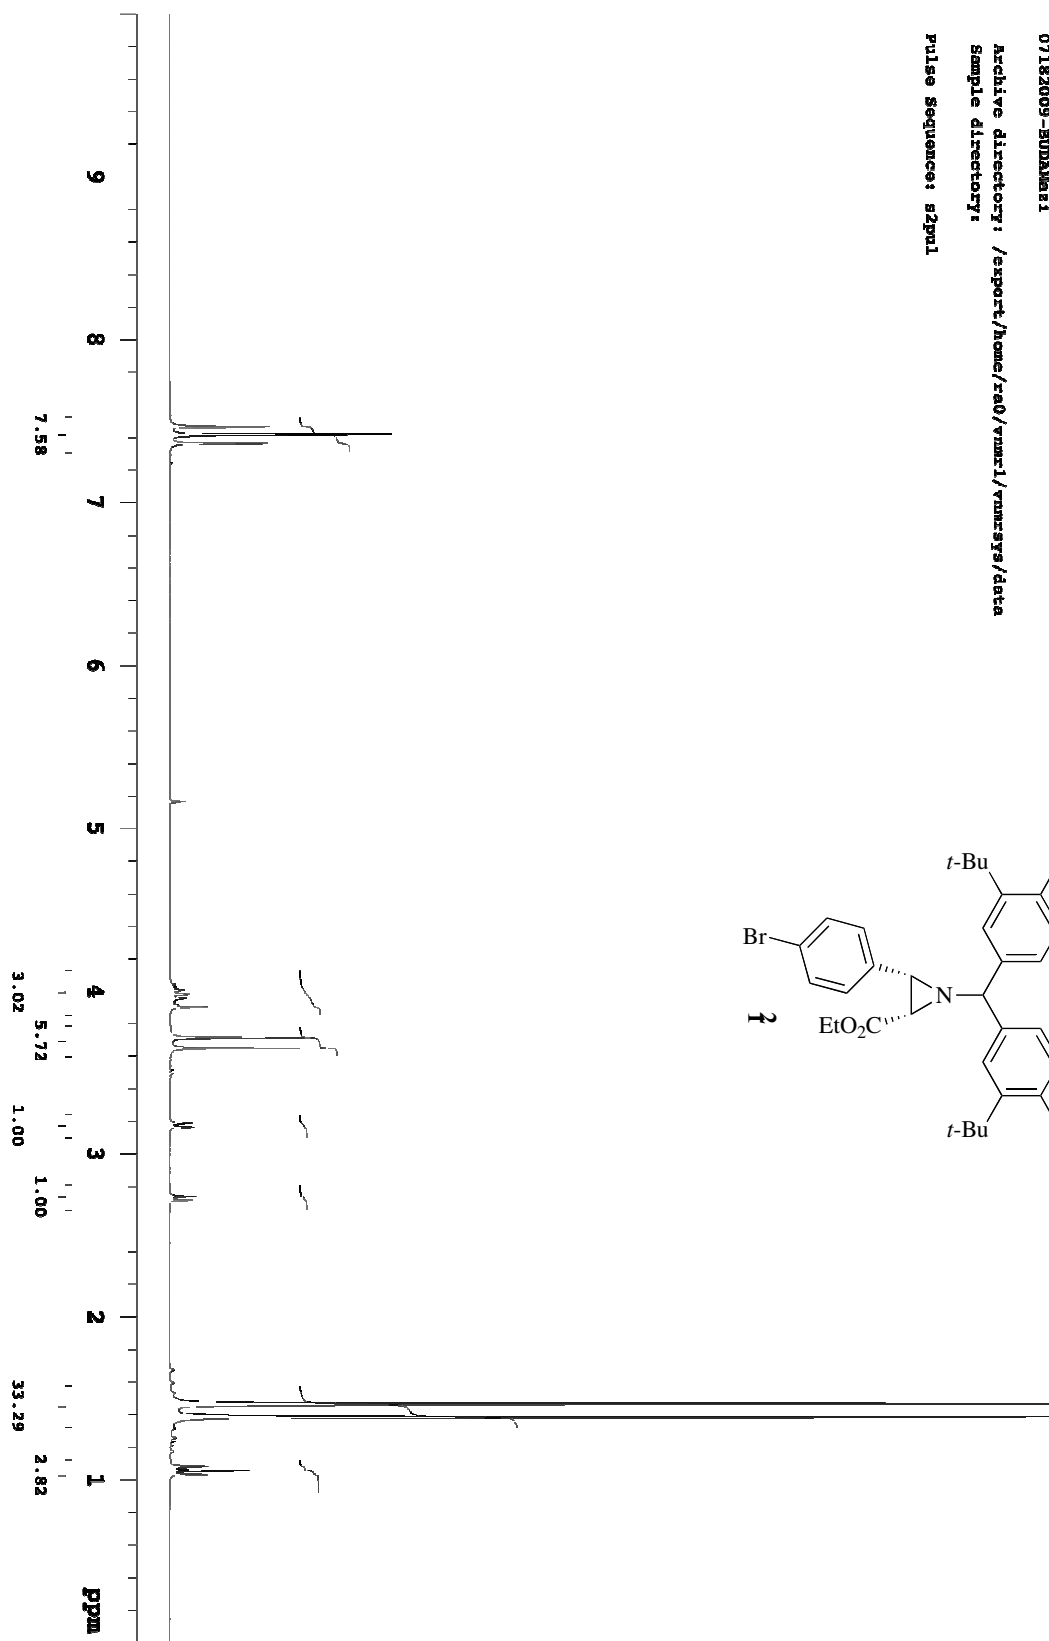

07182009-SUNMar1-13C

Archive directory: /export/home/rs0/vmr1/vmrays/data  
Sample directory:

Pulse sequence: szpm1

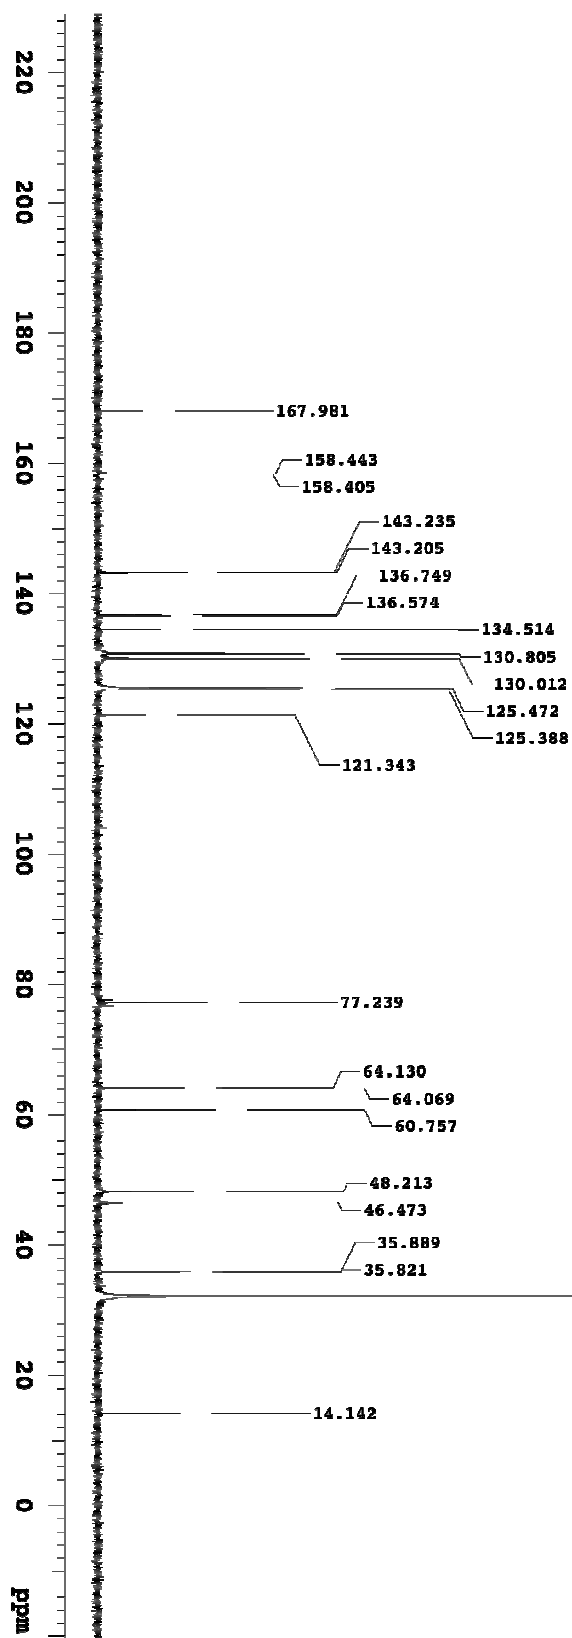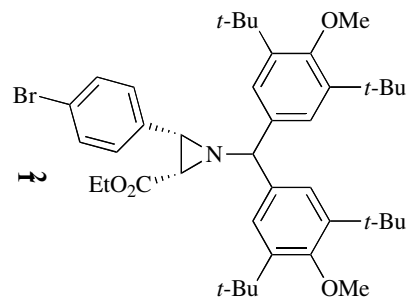

HL2-B3-benzylhyd-ry1071R2009

Pulse Sequence: zgpg1

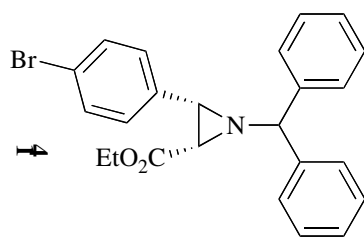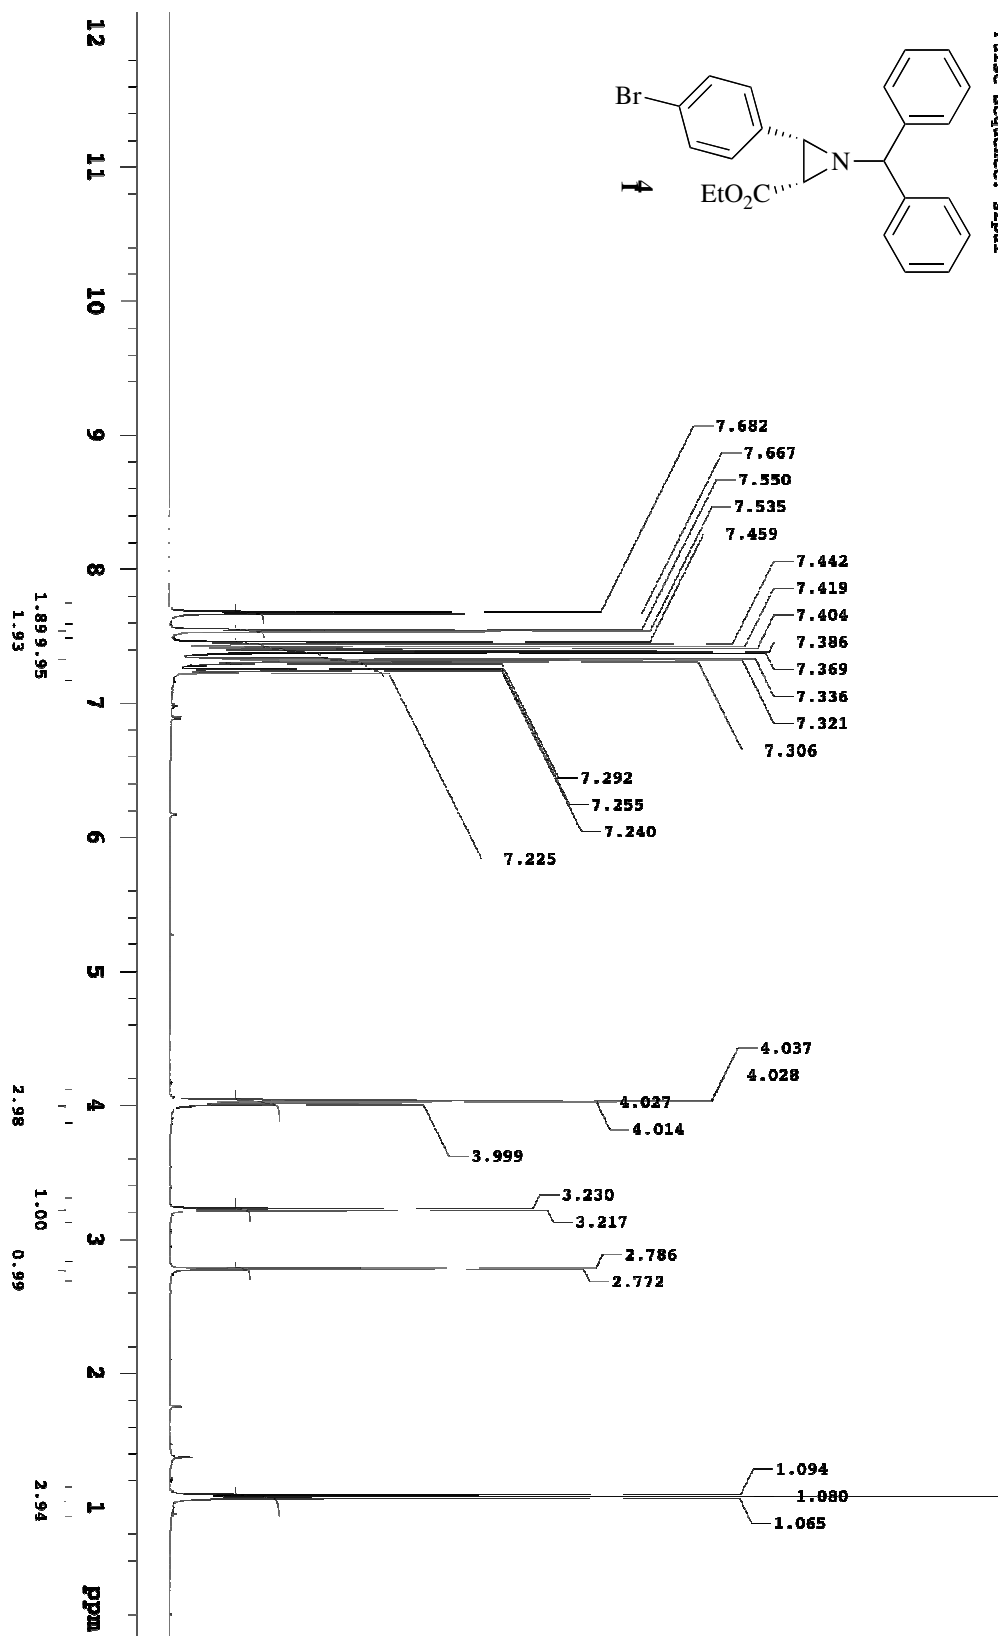

HL2-B3-benzylhydrazyl-13C

Pulse Sequence: zgpg1

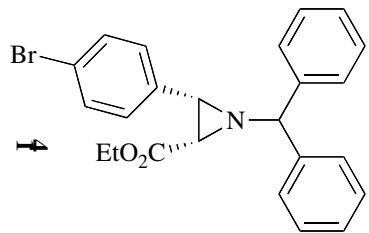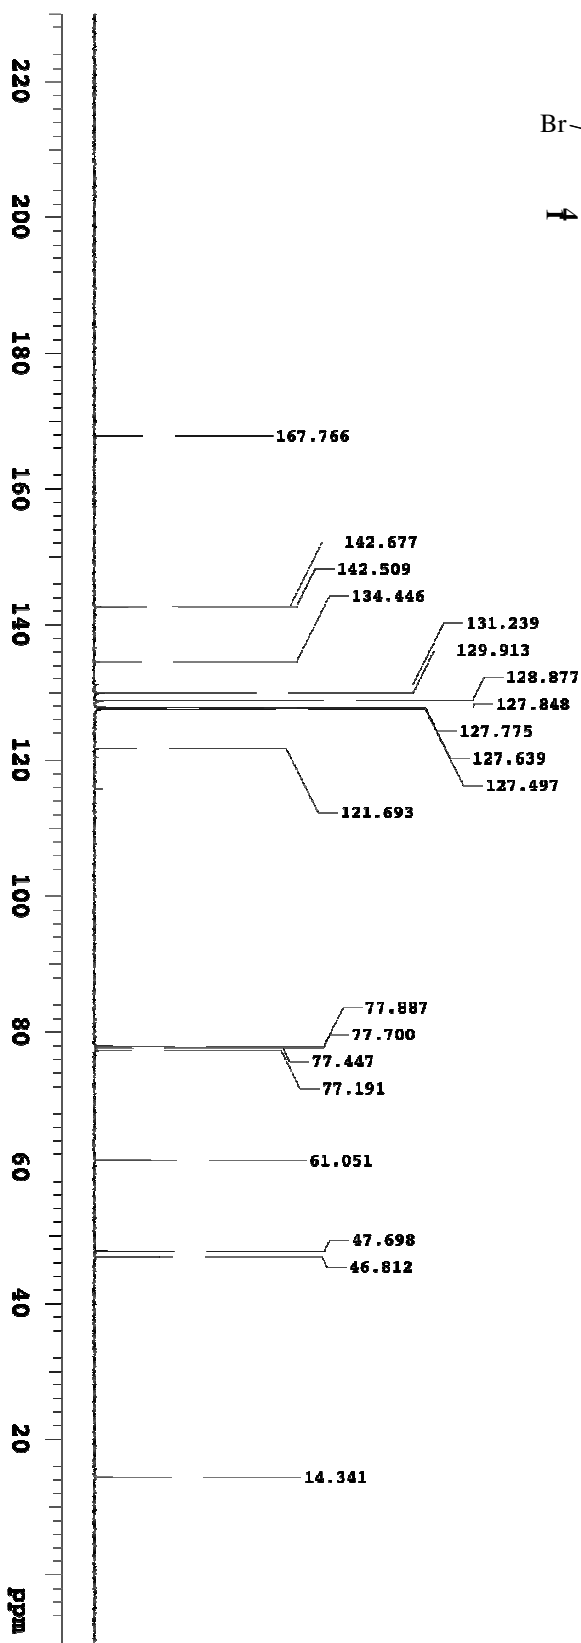

## 9. References:

- 1) Bao, J.; Wulff, W. D.; Dominy, J. B.; Fumo, M. J.; Grant, E. B.; Rob, A. C.; Whitcomb, M. C.; Yeung, S.-M.; Ostrander, R. L.; Rheingold, A. L. *J. Am. Chem. Soc.* **1996**, *118*, 3392-3405.
- 2) Zhang, Y.; Desai, A.; Lu, Z.; Hu, G.; Ding, Z.; Wulff, W. D. *Chem. Eur. J.* **2008**, *14*, 3785-3803.
- 3) Zhang, Y.; Lu, Z.; Desai, A. Wulff, W. D. *Org. Lett.* **2008**, *10*, 5429-5432
